# Supplementary material
Source: publisher figshare collection journal article supplement (https://gsapubs.figshare.com/articles/dataset/_/22237114)
Supplement: Supplementary file 1 [file 1]

## Sheet: Hysteresis
Pre-heating								Post-heating
Sample	Mr	Ms	Hcr	Hc	Mrs/Ms	Bcr/Bc		Mr	Ms	Hcr	Hc	Mrs/Ms	Bcr/Bc
639	7.66e-06	7.2379e-05	328.541	113.162	0.106	2.90328		-	-	-	-	-	-				Suevite
646	0.08387	0.974918	336.282	86.538	0.086	3.88595		-	-	-	-	-	-				UIM
646 2	0.351213	4.258	322.222	70.895	0.082	4.54506		-	-	-	-	-	-				Basement
683	0.077033	0.561071	306.795	128.19	0.142	2.39328		-	-	-	-	-	-				LIM dyke
683 2	0.634072	9.907	328.216	81.414	0.064	4.03144		-	-	-	-	-	-				UIM
688	1.424e-05	0.000118292	369.717	164.166	0.119	2.25209		-	-	-	-	-	-
700	0.052074	1.514	353.602	52.022	0.034	6.79716		-	-	-	-	-	-
700 2	0.081254	0.922836	335.372	115.559	0.088	2.90217		-	-	-	-	-	-
721	0.000484987	0.002439	370.379	123.167	0.199	3.00713		-	-	-	-	-	-
727	0.380513	4.344	298.859	61.249	0.088	4.87941		0.420494	2.55	478.766	128.601	0.165	3.72288
727 2	2.534	17.386	363.82	121.477	0.146	2.99497		-	-	-	-	-	-
732	0.001988	0.055145	313.844	47.085	0.036	6.66548		0.420496	4.729	332.544	120.404	0.089	2.7619
738	0.005047	0.086586	338.074	75.71	0.058	4.46538		5.747	63.273	348.346	82.166	0.091	4.23954
744	5.044	99.187	311.867	42.11	0.051	7.40601		7.18	88.7	201.746	60.671	0.081	3.32525
744 2	6.964	78.817	400.177	89.149	0.088	4.48886		-	-	-	-	-	-
747	0.524726	8.713	361.606	81.537	0.06	4.43487		0.505444	8.049	306.549	78.338	0.063	3.91316
747 2	13.455	56.766	313.024	156.468	0.237	2.00056		-	-	-	-	-	-
763	0.05321	0.254828	382.02	157.586	0.209	2.4242		-	-	-	-	-	-
804	0.223521	2.398	321.271	96.568	0.093	3.32689		0.028905	0.270995	535.722	151.196	0.107	3.54323
810	0.069485	0.886474	354.814	101.169	0.078	3.50714		0.055165	0.575965	382.711	104.716	0.096	3.65475	REJECTED
847	31.269	71.611	801.731	495.757	0.437	1.61719		-	-	-	-	-	-
847 2	79.135	259.982	475.493	300.416	0.304	1.58278		-	-	-	-	-	-
967	0.854906	14.868	334.262	80.15	0.057	4.17046		-	-	-	-	-	-
982	0.103139	1.708	351.985	86.406	0.06	4.07362		-	-	-	-	-	-
994 2	0.227829	3.483	330.358	89.615	0.065	3.68641		-	-	-	-	-	-
995A g	5.408	25.86	363.959	185.704	0.209	1.95989		6.25	25.803	439.698	226.888	0.242	1.93795
995A m	6.869	39.945	379.718	175.006	0.172	2.16974		8.62	41.635	435.584	217.835	0.207	1.99961
995B	4.969	22.87	349.997	182.768	0.217	1.91498		-	-	-	-	-	-
997	7.964	33.027	531.184	267.124	0.241	1.98853		-	-	-	-	-	-
997 2	9.153	38.967	461.327	228.268	0.235	2.02099		-	-	-	-	-	-
999 C	1.289	5.564	465.836	220.637	0.232	2.11132		0.763339	2.963	532.08	264.221	0.258	2.01377
999 G1	0.03895	0.151389	364.517	165.88	0.257	2.19747		0.061171	0.279005	468.478	214.593	0.219	2.1831	REJECTED
999 G2	0.322918	1.499	370.837	183.012	0.215	2.0263		0.371515	1.255	608.975	311.197	0.296	1.95688	REJECTED
999 G3 2	5.53	29.264	416.727	164.908	0.189	2.52703		-	-	-	-	-	-
999 M1	11.149	42.322	400.587	231.644	0.263	1.72932		14.534	43.204	541.46	332.451	0.336	1.62869
999 M2	21.811	89.386	381.801	216.559	0.244	1.76303		26.512	87.418	503.959	298.586	0.303	1.68782
1085	0.172515	1.275	495.364	233.346	0.135	2.12287		-	-	-	-	-	-
1085 2	0.214596	1.612	572.258	316.038	0.133	1.81073		-	-	-	-	-	-
1097	2.4674e-05	0.000128138	456.246	232.154	0.194	1.96527		0.068635	0.22649	466.768	372.709	0.292	1.25237	REJECTED
1100	0.006791	0.07848	323.482	124.289	0.087	2.60266		4.458	49.824	326.208	111.831	0.089	2.91697
1135A	4.5762e-05	0.000701931	425.967	119.788	0.065	3.55601		-	-	-	-	-	-
1135B	1.165	24.957	374.173	77.83	0.047	4.80757		-	-	-	-	-	-
1135B 2	4.218	86.376	359.283	78.356	0.049	4.58526		-	-	-	-	-	-
1137	2.823	29.194	402.108	144.608	0.097	2.78068		-	-	-	-	-	-
1137 2	3.128	26.934	410.401	163.064	0.116	2.51681		-	-	-	-	-	-
1140	1.6562e-05	9.6994e-05	369.072	136.701	0.17	2.69985		-	-	-	-	-	-
1149	2.324e-05	0.000282906	411.174	116.99	0.082	3.51461		REJECTED	REJECTED	REJECTED	REJECTED	REJECTED	REJECTED	REJECTED
1150	6.7989e-05	0.000807686	324.675	119.187	0.084	2.72408		0.012377	0.054515	570.971	388.546	0.227	1.46951	REJECTED
1161	0.00025574	0.002816	320.601	110.294	0.091	2.90679		-	-	-	-	-	-
1194	0.000391026	0.007739	352.787	96.443	0.051	3.65798		0.38823	7.301	324.921	76.477	0.053	4.24861
1197	8.176e-06	0.000116489	341.654	100.491	0.07	3.39985		-	-	-	-	-	-
1224A	1.989	4.043	367.513	287.422	0.492	1.27865		-	-	-	-	-	-
1224B	2.373	6.547	401.945	262.114	0.362	1.53347		-	-	-	-	-	-
1224C	0.813891	11.118	319.979	78.965	0.073	4.05216		0.88867	10.211	307.323	88.904	0.087	3.4568
1224D g	0.731065	2.763	423.328	233.941	0.265	1.80955		0.74576	2.493	646.503	334.747	0.299	1.93132
1224D m	0.518876	4.389	399.964	143.37	0.118	2.78973		-	-	-	-	-	-
1225	12.115	54.961	518.69	212.895	0.22	2.43637		-	-	-	-	-	-
1225 2	15.069	72.091	532.647	224.2	0.209	2.37577		-	-	-	-	-	-
1231	14.058	198.356	283.396	66.593	0.071	4.25564		-	-	-	-	-	-
1249	2.47	14.101	462.844	215.532	0.175	2.14745		-	-	-	-	-	-
1249 2	4.371	25.129	419.16	177.918	0.174	2.35592		-	-	-	-	-	-
1326	0.266439	1.874	364.218	143.433	0.142	2.53929		-	-	-	-	-	-
1326 2	0.259892	2.819	328.872	99.034	0.092	3.3208		-	-	-	-	-	-

## Sheet: 727
				Heating HT					Cooling HT
TEMP	CSUSC	CSUSC+3	1st deriv	knormed			CSUSC+3	1st deriv	knormed			Mr	Ms	Hcr	Hc	Mrs/Ms	Bcr/Bc	ΔMr/Ms	ΔBcr/Bc
27.2	1.4	4.4	-0.366667	1	610	-1.48	1.52	0.166667	0.345455		BEFORE	0.380513	4.344	298.859	61.249	0.088	4.87941	0.077	-1.15653
27.5	1.29	4.29	0.0222222	0.975	609.4	-1.58	1.42	-0.283333	0.322727		AFTER	0.420494	2.55	478.766	128.601	0.165	3.72288
29.3	1.33	4.33	0.0451613	0.984091	608.8	-1.41	1.59	0.323077	0.361364
32.4	1.47	4.47	-0.25	1.01591	607.5	-1.83	1.17	-0.131818	0.265909
36	0.57	3.57	0.275	0.811364	605.3	-1.54	1.46	-0.135714	0.331818
39.6	1.56	4.56	0.0153846	1.03636	602.5	-1.16	1.84	-0.083871	0.418182
43.5	1.62	4.62	0.110811	1.05	599.4	-0.9	2.1	0.372973	0.477273
47.2	2.03	5.03	-0.0636364	1.14318	595.7	-2.28	0.72	0.0894737	0.163636
50.5	1.82	4.82	-0.0470588	1.09545	591.9	-2.62	0.38	-0.411765	0.0863636
53.9	1.66	4.66	0.0322581	1.05909	588.5	-1.22	1.78	0.083871	0.404545
57	1.76	4.76	0.05	1.08182	585.4	-1.48	1.52	0.05	0.345455
60.2	1.92	4.92	0.0607143	1.11818	582.6	-1.62	1.38	-0.0588235	0.313636
63	2.09	5.09	-0.338462	1.15682	579.2	-1.42	1.58	0.0441176	0.359091
65.6	1.21	4.21	0.503846	0.956818	575.8	-1.57	1.43	0.0733333	0.325
68.2	2.52	5.52	-0.351852	1.25455	572.8	-1.79	1.21	-0.0903226	0.275
70.9	1.57	4.57	0.556522	1.03864	569.7	-1.51	1.49	-0.193548	0.338636
73.2	2.85	5.85	0.226923	1.32955	566.6	-0.91	2.09	-0.0677419	0.475
75.8	3.44	6.44	-0.569231	1.46364	563.5	-0.7	2.3	0.182353	0.522727
78.4	1.96	4.96	0.075	1.12727	560.1	-1.32	1.68	-0.166667	0.381818
80.8	2.14	5.14	-0.4	1.16818	556.8	-0.77	2.23	-0.125806	0.506818
82.9	1.3	4.3	0.409524	0.977273	553.7	-0.38	2.62	-0.0774194	0.595455
85	2.16	5.16	-0.0625	1.17273	550.6	-0.14	2.86	0.0878788	0.65
87.4	2.01	5.01	0.108696	1.13864	547.3	-0.43	2.57	-0.106452	0.584091
89.7	2.26	5.26	-0.0619048	1.19545	544.2	-0.1	2.9	-0.162963	0.659091		Tc1	Tc2
91.8	2.13	5.13	0.133333	1.16591	541.5	0.34	3.34	0.206452	0.759091		551.3	591.9
94.2	2.45	5.45	-0.370833	1.23864	538.4	-0.3	2.7	-0.287879	0.613636		HPR 1	HPR 2	A40[%]
96.6	1.56	4.56	0.173913	1.03636	535.1	0.65	3.65	0.225806	0.829545		-	-	5.70175
98.9	1.96	4.96	0.0375	1.12727	532	-0.05	2.95	0.0363636	0.670455		Kmax h	Kmax c
101.3	2.05	5.05	0.0666667	1.14773	528.7	-0.17	2.83	-0.276667	0.643182
103.7	2.21	5.21	0.15	1.18409	525.7	0.66	3.66	0.0294118	0.831818
106.3	2.6	5.6	0.0310345	1.27273	522.3	0.56	3.56	-0.0333333	0.809091
109.2	2.69	5.69	-0.103704	1.29318	518.7	0.68	3.68	-0.0393939	0.836364
111.9	2.41	5.41	-0.207692	1.22955	515.4	0.81	3.81	0.0848485	0.865909
114.5	1.87	4.87	0.166667	1.10682	512.1	0.53	3.53	-0.194595	0.802273
117.5	2.37	5.37	-0.0931034	1.22045	508.4	1.25	4.25	-0.188889	0.965909
120.4	2.1	5.1	-0.0230769	1.15909	504.8	1.93	4.93	0.241026	1.12045
123	2.04	5.04	-0.00344828	1.14545	500.9	0.99	3.99	-0.0777778	0.906818
125.9	2.03	5.03	-0.0833333	1.14318	497.3	1.27	4.27	-0.116667	0.970455
128.9	1.78	4.78	0.123077	1.08636	493.7	1.69	4.69	0.244444	1.06591
131.5	2.1	5.1	0.137037	1.15909	490.1	0.81	3.81	-0.139394	0.865909
134.2	2.47	5.47	-0.137037	1.24318	486.8	1.27	4.27	0.109091	0.970455
136.9	2.1	5.1	-0.0153846	1.15909	483.5	0.91	3.91	-0.182857	0.888636
139.5	2.06	5.06	0.0296296	1.15	480	1.55	4.55	0.213889	1.03409
142.2	2.14	5.14	-0.0925926	1.16818	476.4	0.78	3.78	0.00555556	0.859091
144.9	1.89	4.89	0.255172	1.11136	472.8	0.76	3.76	-0.113889	0.854545
147.8	2.63	5.63	0.0185185	1.27955	469.2	1.17	4.17	-0.3	0.947727
150.5	2.68	5.68	0.0222222	1.29091	465.7	2.22	5.22	0.238889	1.18636
153.2	2.74	5.74	-0.27037	1.30455	462.1	1.36	4.36	0.0583333	0.990909
155.9	2.01	5.01	0.162069	1.13864	458.5	1.15	4.15	-0.05625	0.943182
158.8	2.48	5.48	0.05	1.24545	455.3	1.33	4.33	0.0888889	0.984091
161.8	2.63	5.63	-0.140741	1.27955	451.7	1.01	4.01	-0.237143	0.911364
164.5	2.25	5.25	0.113793	1.19318	448.2	1.84	4.84	0.131579	1.1
167.4	2.58	5.58	0.0666667	1.26818	444.4	1.34	4.34	0.105556	0.986364
170.1	2.76	5.76	-0.0888889	1.30909	440.8	0.96	3.96	-0.24375	0.9
172.8	2.52	5.52	-0.14	1.25455	437.6	1.74	4.74	0.15625	1.07727
175.8	2.1	5.1	-0.159259	1.15909	434.4	1.24	4.24	-0.0433333	0.963636
178.5	1.67	4.67	0.22069	1.06136	431.4	1.37	4.37	0.053125	0.993182
181.4	2.31	5.31	0.00333333	1.20682	428.2	1.2	4.2	-0.13125	0.954545
184.4	2.32	5.32	-0.00333333	1.20909	425	1.62	4.62	0.191429	1.05
187.4	2.31	5.31	0.00666667	1.20682	421.5	0.95	3.95	-0.22	0.897727
190.4	2.33	5.33	0	1.21136	418	1.72	4.72	0.138889	1.07273
193.4	2.33	5.33	0.0185185	1.21136	414.4	1.22	4.22	-0.148571	0.959091
196.1	2.38	5.38	0.00666667	1.22273	410.9	1.74	4.74	0.09375	1.07727
199.1	2.4	5.4	-0.216667	1.22727	407.7	1.44	4.44	-0.253125	1.00909
202.1	1.75	4.75	0.136667	1.07955	404.5	2.25	5.25	0.193103	1.19318
205.1	2.16	5.16	-0.0444444	1.17273	401.6	1.69	4.69	-0.127586	1.06591
207.8	2.04	5.04	0.0766667	1.14545	398.7	2.06	5.06	0.00689655	1.15
210.8	2.27	5.27	-0.0166667	1.19773	395.8	2.04	5.04	-0.0241379	1.14545
213.8	2.22	5.22	0.06	1.18636	392.9	2.11	5.11	0.05	1.16136
216.8	2.4	5.4	0.0366667	1.22727	389.5	1.94	4.94	0.06875	1.12273
219.8	2.51	5.51	-0.110714	1.25227	386.3	1.72	4.72	0.025	1.07273
222.6	2.2	5.2	0.0166667	1.18182	383.1	1.64	4.64	-0.075	1.05455
225.6	2.25	5.25	-0.1	1.19318	379.9	1.88	4.88	-0.0647059	1.10909
228.6	1.95	4.95	0.0814815	1.125	376.5	2.1	5.1	-0.0142857	1.15909
231.3	2.17	5.17	-0.0392857	1.175	373	2.15	5.15	0.00294118	1.17045
234.1	2.06	5.06	0.163333	1.15	369.6	2.14	5.14	0.194737	1.16818
237.1	2.55	5.55	0.0321429	1.26136	365.8	1.4	4.4	-0.0235294	1
239.9	2.64	5.64	-0.00666667	1.28182	362.4	1.48	4.48	-0.0972973	1.01818
242.9	2.62	5.62	-0.1	1.27727	358.7	1.84	4.84	0.142857	1.1
245.7	2.34	5.34	0.04	1.21364	355.2	1.34	4.34	-0.0810811	0.986364
248.7	2.46	5.46	-0.0821429	1.24091	351.5	1.64	4.64	0.0941176	1.05455
251.5	2.23	5.23	0.0407407	1.18864	348.1	1.32	4.32	-0.181081	0.981818
254.2	2.34	5.34	0.0451613	1.21364	344.4	1.99	4.99	0.170588	1.13409
257.3	2.48	5.48	-0.0424242	1.24545	341	1.41	4.41	-0.291429	1.00227
260.6	2.34	5.34	-0.06	1.21364	337.5	2.43	5.43	0.494118	1.23409
263.6	2.16	5.16	0.188235	1.17273	334.1	0.75	3.75	-0.320588	0.852273
267	2.8	5.8	-0.0818182	1.31818	330.7	1.84	4.84	0.0441176	1.1
270.3	2.53	5.53	-0.0516129	1.25682	327.3	1.69	4.69	-0.0756757	1.06591
273.4	2.37	5.37	0.0857143	1.22045	323.6	1.97	4.97	0.0911765	1.12955
276.2	2.61	5.61	-0.0142857	1.275	320.2	1.66	4.66	-0.305882	1.05909
279	2.57	5.57	-0.0962963	1.26591	316.8	2.7	5.7	0.345455	1.29545
281.7	2.31	5.31	0.0676471	1.20682	313.5	1.56	4.56	-0.105882	1.03636
285.1	2.54	5.54	0.0225806	1.25909	310.1	1.92	4.92	0.0294118	1.11818
288.2	2.61	5.61	-0.103571	1.275	306.7	1.82	4.82	0.00882353	1.09545
291	2.32	5.32	-0.030303	1.20909	303.3	1.79	4.79	-0.232353	1.08864
294.3	2.22	5.22	0.1	1.18636	299.9	2.58	5.58	0.113333	1.26818
297.4	2.53	5.53	-0.141176	1.25682	296.9	2.24	5.24	-0.0285714	1.19091
300.8	2.05	5.05	0.102941	1.14773	294.1	2.32	5.32	0.00882353	1.20909
304.2	2.4	5.4	-0.0612903	1.22727	290.7	2.29	5.29	0.0516129	1.20227
307.3	2.21	5.21	-0.0709677	1.18409	287.6	2.13	5.13	0.0967742	1.16591
310.4	1.99	4.99	0.0030303	1.13409	284.5	1.83	4.83	-0.0939394	1.09773
313.7	2	5	-0.0911765	1.13636	281.2	2.14	5.14	-0.0588235	1.16818
317.1	1.69	4.69	-0.167647	1.06591	277.8	2.34	5.34	0.146667	1.21364
320.5	1.12	4.12	0.232353	0.936364	274.8	1.9	4.9	-0.0709677	1.11364
323.9	1.91	4.91	0.00294118	1.11591	271.7	2.12	5.12	0.0258065	1.16364
327.3	1.92	4.92	0.0588235	1.11818	268.6	2.04	5.04	-0.23	1.14545
330.7	2.12	5.12	-0.141379	1.16364	265.6	2.73	5.73	0.0121212	1.30227
333.6	1.71	4.71	0.164706	1.07045	262.3	2.69	5.69	-0.0193548	1.29318
337	2.27	5.27	-0.0405405	1.19773	259.2	2.75	5.75	0.183333	1.30682
340.7	2.12	5.12	-0.111765	1.16364	256.2	2.2	5.2	0	1.18182
344.1	1.74	4.74	0.0459459	1.07727	253.4	2.2	5.2	-0.0714286	1.18182
347.8	1.91	4.91	-0.0612903	1.11591	250.6	2.4	5.4	0.0037037	1.22727
350.9	1.72	4.72	0.0685714	1.07273	247.9	2.39	5.39	0.16	1.225
354.4	1.96	4.96	0.00714286	1.12727	245.4	1.99	4.99	-0.157143	1.13409
357.2	1.98	4.98	-0.06	1.13182	242.6	2.43	5.43	0.08	1.23409
360.7	1.77	4.77	-0.0225806	1.08409	240.1	2.23	5.23	-0.133333	1.18864
363.8	1.7	4.7	0.053125	1.06818	237.7	2.55	5.55	0.0392857	1.26136
367	1.87	4.87	0.0607143	1.10682	234.9	2.44	5.44	0.222222	1.23636
369.8	2.04	5.04	-0.0625	1.14545	232.2	1.84	4.84	-0.160714	1.1
373	1.84	4.84	0.0628571	1.1	229.4	2.29	5.29	0.14	1.20227
376.5	2.06	5.06	-0.170968	1.15	226.4	1.87	4.87	-0.128571	1.10682
379.6	1.53	4.53	0.12069	1.02955	223.6	2.23	5.23	0.0185185	1.18864
382.5	1.88	4.88	0.06	1.10909	220.9	2.18	5.18	0.0666667	1.17727
386	2.09	5.09	-0.0771429	1.15682	218.2	2	5	0.192	1.13636
389.5	1.82	4.82	0.0411765	1.09545	215.7	1.52	4.52	-0.181481	1.02727
392.9	1.96	4.96	0.0157895	1.12727	213	2.01	5.01	-0.025	1.13864
396.7	2.02	5.02	-0.128571	1.14091	210.2	2.08	5.08	0.240741	1.15455
400.2	1.57	4.57	0.196875	1.03864	207.5	1.43	4.43	-0.188889	1.00682
403.4	2.2	5.2	-0.29375	1.18182	204.8	1.94	4.94	-0.044	1.12273
406.6	1.26	4.26	0.14375	0.968182	202.3	2.05	5.05	-0.0296296	1.14773
409.8	1.72	4.72	-0.125	1.07273	199.6	2.13	5.13	0.141667	1.16591
413	1.32	4.32	0.0257143	0.981818	197.2	1.79	4.79	-0.123333	1.08864
416.5	1.41	4.41	0.0428571	1.00227	194.2	2.16	5.16	-0.181481	1.17273
420	1.56	4.56	0.290625	1.03636	191.5	2.65	5.65	0.233333	1.28409
423.2	2.49	5.49	-0.097561	1.24773	188.5	1.95	4.95	-0.0925926	1.125
427.3	2.09	5.09	0.0714286	1.15682	185.8	2.2	5.2	0.125926	1.18182
430.8	2.34	5.34	-0.266667	1.21364	183.1	1.86	4.86	-0.277778	1.10455
433.8	1.54	4.54	0.16875	1.03182	180.4	2.61	5.61	0.0333333	1.275
437	2.08	5.08	-0.268571	1.15455	177.7	2.52	5.52	0.17037	1.25455
440.5	1.14	4.14	-0.0717949	0.940909	175	2.06	5.06	0.214815	1.15
444.4	0.86	3.86	0.278947	0.877273	172.3	1.48	4.48	-0.259259	1.01818
448.2	1.92	4.92	-0.305263	1.11818	169.6	2.18	5.18	0	1.17727
452	0.76	3.76	0.225641	0.854545	166.9	2.18	5.18	0.207407	1.17727
455.9	1.64	4.64	0.134211	1.05455	164.2	1.62	4.62	-0.0259259	1.05
459.7	2.15	5.15	-0.133333	1.17045	161.5	1.69	4.69	-0.22963	1.06591
463.6	1.63	4.63	0.06	1.05227	158.8	2.31	5.31	0.1375	1.20682
467.1	1.84	4.84	0.0757576	1.1	156.4	1.98	4.98	0.103704	1.13182
470.4	2.09	5.09	0.0923077	1.15682	153.7	1.7	4.7	-0.207407	1.06818
474.3	2.45	5.45	-0.211111	1.23864	151	2.26	5.26	0.123077	1.19545
477.9	1.69	4.69	0.059375	1.06591	148.4	1.94	4.94	0.116	1.12273
481.1	1.88	4.88	-0.0805556	1.10909	145.9	1.65	4.65	-0.3	1.05682
484.7	1.59	4.59	-0.153846	1.04318	143.3	2.43	5.43	0.0222222	1.23409
488.6	0.99	3.99	0.157576	0.906818	140.6	2.37	5.37	0.231034	1.22045
491.9	1.51	4.51	-0.169697	1.025	137.7	1.7	4.7	0.0037037	1.06818
495.2	0.95	3.95	0.348485	0.897727	135	1.69	4.69	-0.00689655	1.06591
498.5	2.1	5.1	-0.0416667	1.15909	132.1	1.71	4.71	-0.122222	1.07045
502.1	1.95	4.95	-0.197222	1.125	129.4	2.04	5.04	0.0962963	1.14545
505.7	1.24	4.24	0.0305556	0.963636	126.7	1.78	4.78	0.0538462	1.08636
509.3	1.35	4.35	0.0648649	0.988636	124.1	1.64	4.64	0.0275862	1.05455
513	1.59	4.59	-0.0589744	1.04318	121.2	1.56	4.56	-0.0555556	1.03636
516.9	1.36	4.36	-0.107692	0.990909	118.5	1.71	4.71	-0.0375	1.07045
520.8	0.94	3.94	-0.0209302	0.895455	116.1	1.8	4.8	0.0269231	1.09091
525.1	0.85	3.85	-0.179487	0.875	113.5	1.73	4.73	0.00416667	1.075
529	0.15	3.15	0.205	0.715909	111.1	1.72	4.72	-0.15	1.07273
533	0.97	3.97	-0.277778	0.902273	108.7	2.08	5.08	0.120833	1.15455
536.6	-0.03	2.97	0.191892	0.675	106.3	1.79	4.79	0.0217391	1.08864
540.3	0.68	3.68	0.00606061	0.836364	104	1.74	4.74	-0.0958333	1.07727
543.6	0.7	3.7	-0.125	0.840909	101.6	1.97	4.97	0.15	1.12955
547.6	0.2	3.2	0.210811	0.727273	99.2	1.61	4.61	-0.0428571	1.04773
551.3	0.98	3.98	-0.366667	0.904545	97.1	1.7	4.7	0.0190476	1.06818
554.9	-0.34	2.66	0.0675676	0.604545	95	1.66	4.66	0.00833333	1.05909
558.6	-0.09	2.91	-0.305882	0.661364	92.6	1.64	4.64	-0.0714286	1.05455
562	-1.13	1.87	0.123529	0.425	90.5	1.79	4.79	0.052381	1.08864
565.4	-0.71	2.29	-0.197297	0.520455	88.4	1.68	4.68	-0.047619	1.06364
569.1	-1.44	1.56	-0.172727	0.354545	86.3	1.78	4.78	0.0761905	1.08636
572.4	-2.01	0.99	0.358824	0.225	84.2	1.62	4.62	-0.0571429	1.05
575.8	-0.79	2.21	-0.0705882	0.502273	82.1	1.74	4.74	-0.0666667	1.07727
579.2	-1.03	1.97	0.0621622	0.447727	80	1.88	4.88	0.116667	1.10909
582.9	-0.8	2.2	0.0314286	0.5	78.2	1.67	4.67	-0.0666667	1.06136
586.4	-0.69	2.31	-0.0147059	0.525	76.1	1.81	4.81	0.133333	1.09318
589.8	-0.74	2.26	-0.208108	0.513636	74	1.53	4.53	-0.188889	1.02955
593.5	-1.51	1.49	0.152941	0.338636	72.2	1.87	4.87	0.147619	1.10682
596.9	-0.99	2.01	-0.17027	0.456818	70.1	1.56	4.56	-0.278947	1.03636
600.6	-1.62	1.38	0.123684	0.313636	68.2	2.09	5.09	0.372222	1.15682
604.4	-1.15	1.85	-0.216129	0.420455	66.4	1.42	4.42	-0.0888889	1.00455
607.5	-1.82	1.18	0.236842	0.268182	64.6	1.58	4.58	-0.127778	1.04091
609.4	-1.37	1.63	0.816667	0.370455	62.8	1.81	4.81	0.126316	1.09318
610	-0.88	2.12	-0.00144262	0.481818	60.9	1.57	4.57	-0.0266667	1.03864
					59.4	1.61	4.61	-0.116667	1.04773
					57.6	1.82	4.82	0	1.09545
					55.2	1.82	4.82	0.05	1.09545
					52.6	1.69	4.69	-0.0392857	1.06591
					49.8	1.8	4.8	-0.0115385	1.09091
					47.2	1.83	4.83	0.0458333	1.09773
					44.8	1.72	4.72	-0.0434783	1.07273
					42.5	1.82	4.82	0	1.09545
					40.4	1.82	4.82	0	1.09545
					38.9	1.82	4.82	0.0467866	1.09545

## Sheet: 732
				Heating HT					Cooling HT
TEMP	CSUSC		1st deriv	knormed				1st deriv	knormed			Mr	Ms	Hcr	Hc	Mrs/Ms	Bcr/Bc	ΔMr/Ms	ΔBcr/Bc
27.7	45.28	48.28	-0.0333333	1	611.9	-1.82	1.18	0.125	0.0244408		BEFORE	0.001988	0.055145	313.844	47.085	0.036	6.66548	0.053	-3.90358
28	45.27	48.27	-0.03125	0.999793	610.3	-2.02	0.98	-0.00666667	0.0202983		AFTER	0.420496	4.729	332.544	120.404	0.089	2.7619
29.6	45.22	48.22	-0.0178571	0.998757	608.8	-2.01	0.99	-0.008	0.0205054
32.4	45.17	48.17	0.0588235	0.997722	606.3	-1.99	1.01	-0.186364	0.0209196
35.8	45.37	48.37	-0.00277778	1.00186	604.1	-1.58	1.42	-0.256	0.0294118
39.4	45.36	48.36	-0.0638889	1.00166	601.6	-0.94	2.06	0.228	0.0426678
43	45.13	48.13	0.186111	0.996893	599.1	-1.51	1.49	0.245161	0.0308616
46.6	45.8	48.8	-0.229412	1.01077	596	-2.27	0.73	-0.0558824	0.0151201
50	45.02	48.02	0.143243	0.994615	592.6	-2.08	0.92	0.125	0.0190555
53.7	45.55	48.55	-0.122581	1.00559	589.8	-2.43	0.57	-0.628571	0.0118061
56.8	45.17	48.17	0.246429	0.997722	587	-0.67	2.33	0.270588	0.0482601
59.6	45.86	48.86	0.00625	1.01201	583.6	-1.59	1.41	0.137838	0.0292046
62.8	45.88	48.88	-0.180769	1.01243	579.9	-2.1	0.9	-0.385294	0.0186413
65.4	45.41	48.41	0.0807692	1.00269	576.5	-0.79	2.21	-0.122581	0.0457746
68	45.62	48.62	-0.278261	1.00704	573.4	-0.41	2.59	0.0392857	0.0536454
70.3	44.98	47.98	0.107692	0.993786	570.6	-0.52	2.48	-0.182353	0.051367
72.9	45.26	48.26	0.174074	0.999586	567.2	0.1	3.1	-0.908824	0.0642088
75.6	45.73	48.73	-0.215385	1.00932	563.8	3.19	6.19	-0.133333	0.12821
78.2	45.17	48.17	0.0653846	0.997722	560.8	3.59	6.59	-0.689286	0.136495
80.8	45.34	48.34	-0.145833	1.00124	558	5.52	8.52	-0.651613	0.176471
83.2	44.99	47.99	0.185714	0.993993	554.9	7.54	10.54	-0.26	0.21831
85.3	45.38	48.38	-0.0730769	1.00207	551.9	8.32	11.32	-0.605882	0.234466
87.9	45.19	48.19	0.280952	0.998136	548.5	10.38	13.38	-0.493548	0.277133
90	45.78	48.78	-0.2375	1.01036	545.4	11.91	14.91	-0.67	0.308824
92.4	45.21	48.21	-0.0130435	0.99855	542.4	13.92	16.92	-0.317647	0.350456		Tc1	Tc2
94.7	45.18	48.18	0.0962963	0.997929	539	15	18	-0.433333	0.372825		524.2	567.2 / 529
97.4	45.44	48.44	-0.026087	1.00331	535.7	16.43	19.43	-0.403333	0.402444		HPR 1	HPR 2	A40[%]
99.7	45.38	48.38	-0.258333	1.00207	532.7	17.64	20.64	-0.42973	0.427506		-	-	-17.0389
102.1	44.76	47.76	0.320833	0.989229	529	19.23	22.23	-0.675758	0.460439		Kmax h	Kmax c
104.5	45.53	48.53	0.0769231	1.00518	525.7	21.46	24.46	-0.264706	0.506628
107.1	45.73	48.73	0.037037	1.00932	522.3	22.36	25.36	-0.157576	0.525269
109.8	45.83	48.83	-0.165385	1.01139	519	22.88	25.88	-0.175	0.53604
112.4	45.4	48.4	0.0592593	1.00249	515.4	23.51	26.51	-0.551515	0.549089
115.1	45.56	48.56	-0.0724138	1.0058	512.1	25.33	28.33	-0.0941176	0.586785
118	45.35	48.35	0.0961538	1.00145	508.7	25.65	28.65	-0.409091	0.593413
120.6	45.6	48.6	-0.0259259	1.00663	505.4	27	30	0.0878788	0.621375
123.3	45.53	48.53	0.115385	1.00518	502.1	26.71	29.71	-0.4	0.615369
125.9	45.83	48.83	-0.125926	1.01139	498.8	28.03	31.03	-0.441667	0.642709
128.6	45.49	48.49	0.106897	1.00435	495.2	29.62	32.62	-0.0181818	0.675642
131.5	45.8	48.8	-0.122222	1.01077	491.9	29.68	32.68	-0.342424	0.676885
134.2	45.47	48.47	-0.134483	1.00394	488.6	30.81	33.81	-0.438889	0.70029
137.1	45.08	48.08	-0.0777778	0.995857	485	32.39	35.39	0.0666667	0.733016
139.8	44.87	47.87	0.1	0.991508	481.4	32.15	35.15	-0.0628571	0.728045
142.5	45.14	48.14	-0.134615	0.9971	477.9	32.37	35.37	-0.3	0.732601
145.1	44.79	47.79	0.0833333	0.989851	474.6	33.36	36.36	-0.279487	0.753107
148.1	45.04	48.04	0.207407	0.995029	470.7	34.45	37.45	0.108333	0.775684
150.8	45.6	48.6	-0.1	1.00663	467.1	34.06	37.06	-0.37561	0.767606
153.4	45.34	48.34	0.156667	1.00124	463	35.6	38.6	-0.230769	0.799503
156.4	45.81	48.81	-0.159259	1.01098	459.1	36.5	39.5	0.0742857	0.818144
159.1	45.38	48.38	0.0185185	1.00207	455.6	36.24	39.24	-0.3	0.812759
161.8	45.43	48.43	-0.177778	1.00311	451.7	37.41	40.41	0.162857	0.836993
164.5	44.95	47.95	0.113793	0.993165	448.2	36.84	39.84	-0.345714	0.825186
167.4	45.28	48.28	-0.0814815	1	444.7	38.05	41.05	-0.154545	0.850249
170.1	45.06	48.06	-0.02	0.995443	441.4	38.56	41.56	0.003125	0.860812
173.1	45	48	0.111111	0.9942	438.2	38.55	41.55	0.126667	0.860605
175.8	45.3	48.3	-0.122222	1.00041	435.2	38.17	41.17	0.134483	0.852734
178.5	44.97	47.97	0.0137931	0.993579	432.3	37.78	40.78	-0.637931	0.844656
181.4	45.01	48.01	0.203333	0.994408	429.4	39.63	42.63	0.04	0.882974
184.4	45.62	48.62	-0.0481481	1.00704	426.4	39.51	42.51	-0.05625	0.880489
187.1	45.49	48.49	-0.290909	1.00435	423.2	39.69	42.69	-0.165625	0.884217
190.4	44.53	47.53	0.333333	0.984466	420	40.22	43.22	0.04375	0.895195
193.4	45.53	48.53	0.0166667	1.00518	416.8	40.08	43.08	0.340625	0.892295
196.4	45.58	48.58	-0.062069	1.00621	413.6	38.99	41.99	-0.242857	0.869718
199.3	45.4	48.4	0.0178571	1.00249	410.1	39.84	42.84	0.134286	0.887324
202.1	45.45	48.45	-0.0222222	1.00352	406.6	39.37	42.37	-0.217143	0.877589
204.8	45.39	48.39	-0.15	1.00228	403.1	40.13	43.13	-0.23125	0.893331
207.8	44.94	47.94	-0.0259259	0.992958	399.9	40.87	43.87	-0.1	0.908658
210.5	44.87	47.87	-0.0142857	0.991508	396.7	41.19	44.19	0.090625	0.915286
213.3	44.83	47.83	-0.06	0.990679	393.5	40.9	43.9	-0.0685714	0.909279
216.3	44.65	47.65	0.266667	0.986951	390	41.14	44.14	0.1	0.91425
219	45.37	48.37	-0.3	1.00186	386.6	40.8	43.8	-0.162069	0.907208
221.7	44.56	47.56	0.257143	0.985087	383.7	41.27	44.27	0.0771429	0.916943
224.5	45.28	48.28	0.15	1	380.2	41	44	0	0.91135
227.5	45.73	48.73	-0.133333	1.00932	376.8	41	44	0.23125	0.91135
230.5	45.33	48.33	-0.048	1.00104	373.6	40.26	43.26	-0.0586207	0.896023
233	45.21	48.21	-0.0633333	0.99855	370.7	40.43	43.43	0.0176471	0.899544
236	45.02	48.02	0.210714	0.994615	367.3	40.37	43.37	0.103125	0.898302
238.8	45.61	48.61	-0.241667	1.00684	364.1	40.04	43.04	0.00625	0.891466
241.2	45.03	48.03	0.331818	0.994822	360.9	40.02	43.02	-0.0709677	0.891052
243.4	45.76	48.76	-0.444	1.00994	357.8	40.24	43.24	0.0344828	0.895609
245.9	44.65	47.65	0.004	0.986951	354.9	40.14	43.14	-0.132258	0.893538
248.4	44.66	47.66	0.0964286	0.987158	351.8	40.55	43.55	-0.0580645	0.90203
251.2	44.93	47.93	0.136667	0.992751	348.7	40.73	43.73	-0.04375	0.905758
254.2	45.34	48.34	0.0121212	1.00124	345.5	40.87	43.87	0.109677	0.908658
257.5	45.38	48.38	0.0794118	1.00207	342.4	40.53	43.53	-0.129412	0.901616
260.9	45.65	48.65	-0.196667	1.00766	339	40.97	43.97	0.0783784	0.910729
263.9	45.06	48.06	0.335484	0.995443	335.3	40.68	43.68	0.059375	0.904722
267	46.1	49.1	-0.153333	1.01698	332.1	40.49	43.49	-0.214706	0.900787
270	45.64	48.64	-0.154839	1.00746	328.7	41.22	44.22	0.580645	0.915907
273.1	45.16	48.16	0.0892857	0.997514	325.6	39.42	42.42	-0.281081	0.878625
275.9	45.41	48.41	-0.0451613	1.00269	321.9	40.46	43.46	-0.106452	0.900166
279	45.27	48.27	-0.0566667	0.999793	318.8	40.79	43.79	0.297059	0.907001
282	45.1	48.1	0.0107143	0.996272	315.4	39.78	42.78	-0.209677	0.886081
284.8	45.13	48.13	0.2	0.996893	312.3	40.43	43.43	-0.0727273	0.899544
288.2	45.81	48.81	-0.290323	1.01098	309	40.67	43.67	0.122581	0.904515
291.3	44.91	47.91	0.124242	0.992336	305.9	40.29	43.29	-0.0432432	0.896645
294.6	45.32	48.32	-0.114706	1.00083	302.2	40.45	43.45	0.182353	0.899959
298	44.93	47.93	0.135484	0.992751	298.8	39.83	42.83	-0.222222	0.887117
301.1	45.35	48.35	0.0472222	1.00145	295.2	40.63	43.63	0.164516	0.903687
304.7	45.52	48.52	-0.0741935	1.00497	292.1	40.12	43.12	-0.166667	0.893123
307.8	45.29	48.29	-0.0558824	1.00021	288.5	40.72	43.72	0.213514	0.905551
311.2	45.1	48.1	-0.00294118	0.996272	284.8	39.93	42.93	-0.0363636	0.889188
314.6	45.09	48.09	-0.0147059	0.996065	281.5	40.05	43.05	-0.151613	0.891674
318	45.04	48.04	-0.105882	0.995029	278.4	40.52	43.52	0.173529	0.901408
321.4	44.68	47.68	0.05	0.987572	275	39.93	42.93	0.01	0.889188
324.8	44.85	47.85	0.0147059	0.991094	272	39.9	42.9	0.0764706	0.888567
328.2	44.9	47.9	0.0419355	0.992129	268.6	39.64	42.64	-0.196667	0.883181
331.3	45.03	48.03	0.00967742	0.994822	265.6	40.23	43.23	0.0451613	0.895402
334.4	45.06	48.06	0.00645161	0.995443	262.5	40.09	43.09	0.05	0.892502
337.5	45.08	48.08	-0.183784	0.995857	259.5	39.94	42.94	-0.139394	0.889395
341.2	44.4	47.4	0.248571	0.981773	256.2	40.4	43.4	0.285714	0.898923
344.7	45.27	48.27	0.00882353	0.999793	253.4	39.6	42.6	0.0677419	0.882353
348.1	45.3	48.3	0.103226	1.00041	250.3	39.39	42.39	0.0666667	0.878003
351.2	45.62	48.62	-0.01875	1.00704	247.3	39.19	42.19	-0.16	0.873861
354.4	45.56	48.56	-0.205882	1.0058	244.8	39.59	42.59	-0.183333	0.882146
357.8	44.86	47.86	0.00322581	0.991301	241.8	40.14	43.14	-0.0464286	0.893538
360.9	44.87	47.87	0.0114286	0.991508	239	40.27	43.27	0.407407	0.89623
364.4	44.91	47.91	0.162069	0.992336	236.3	39.17	42.17	-0.153571	0.873447
367.3	45.38	48.38	0.0870968	1.00207	233.5	39.6	42.6	0.0777778	0.882353
370.4	45.65	48.65	-0.00625	1.00766	230.8	39.39	42.39	0.0821429	0.878003
373.6	45.63	48.63	-0.103846	1.00725	228	39.16	42.16	0.181481	0.873239
376.2	45.36	48.36	0.0172414	1.00166	225.3	38.67	41.67	-0.359259	0.86309
379.1	45.41	48.41	-0.153571	1.00269	222.6	39.64	42.64	-0.0387097	0.883181
381.9	44.98	47.98	-0.03125	0.993786	219.5	39.76	42.76	0.0925926	0.885667
385.1	44.88	47.88	-0.2625	0.991715	216.8	39.51	42.51	0.103333	0.880489
388.3	44.04	47.04	0.228571	0.974316	213.8	39.2	42.2	0.037037	0.874068
391.8	44.84	47.84	-0.193103	0.990886	211.1	39.1	42.1	-0.164286	0.871997
394.7	44.28	47.28	0.12	0.979287	208.3	39.56	42.56	-0.0037037	0.881524
398.2	44.7	47.7	-0.412903	0.987987	205.6	39.57	42.57	0.196296	0.881732
401.3	43.42	46.42	0.182857	0.961475	202.9	39.04	42.04	-0.0966667	0.870754
404.8	44.06	47.06	-0.248571	0.974731	199.9	39.33	42.33	0.0518519	0.876761
408.3	43.19	46.19	-0.0828571	0.956711	197.2	39.19	42.19	0.0518519	0.873861
411.8	42.9	45.9	0.12	0.950704	194.5	39.05	42.05	-0.210714	0.870961
415.3	43.32	46.32	0.202857	0.959403	191.7	39.64	42.64	0.144444	0.883181
418.8	44.03	47.03	0.00285714	0.974109	189	39.25	42.25	-0.062963	0.875104
422.3	44.04	47.04	-0.197143	0.974316	186.3	39.42	42.42	0.166667	0.878625
425.8	43.35	46.35	0.239394	0.960025	183.6	38.97	41.97	-0.0185185	0.869304
429.1	44.14	47.14	-0.240625	0.976388	180.9	39.02	42.02	-0.0555556	0.87034
432.3	43.37	46.37	0.425714	0.960439	178.2	39.17	42.17	0.166667	0.873447
435.8	44.86	47.86	-0.405263	0.991301	175.5	38.72	41.72	0.0777778	0.864126
439.6	43.32	46.32	-0.00769231	0.959403	172.8	38.51	41.51	-0.075	0.859776
443.5	43.29	46.29	0.0314286	0.958782	170.4	38.69	41.69	0.151852	0.863505
447	43.4	46.4	-0.209091	0.96106	167.7	38.28	41.28	-0.0791667	0.855012
450.3	42.71	45.71	0.0657143	0.946769	165.3	38.47	41.47	0.12963	0.858948
453.8	42.94	45.94	0.147222	0.951533	162.6	38.12	41.12	-0.318519	0.851698
457.4	43.47	46.47	-0.1	0.96251	159.9	38.98	41.98	0.337037	0.869511
461.2	43.09	46.09	0.312821	0.95464	157.2	38.07	41.07	0.0296296	0.850663
465.1	44.31	47.31	-0.139474	0.979909	154.5	37.99	40.99	-0.125926	0.849006
468.9	43.78	46.78	-0.0948718	0.968931	151.8	38.33	41.33	-0.103846	0.856048
472.8	43.41	46.41	0.0361111	0.961268	149.2	38.6	41.6	0.0518519	0.86164
476.4	43.54	46.54	-0.0416667	0.96396	146.5	38.46	41.46	-0.311111	0.858741
480	43.39	46.39	-0.0114286	0.960853	143.8	39.3	42.3	0.262963	0.876139
483.5	43.35	46.35	-0.1	0.960025	141.1	38.59	41.59	0.127586	0.861433
487.1	42.99	45.99	-0.0948718	0.952568	138.2	38.22	41.22	0.0724138	0.85377
491	42.62	45.62	0.0666667	0.944905	135.3	38.01	41.01	0.0703704	0.84942
494.6	42.86	45.86	-0.102778	0.949876	132.6	37.82	40.82	0.103704	0.845485
498.2	42.49	45.49	0.0166667	0.942212	129.9	37.54	40.54	-0.173077	0.839685
501.8	42.55	45.55	-0.130769	0.943455	127.3	37.99	40.99	-0.0916667	0.849006
505.7	42.04	45.04	-0.0939394	0.932891	124.9	38.21	41.21	0.185185	0.853563
509	41.73	44.73	-0.11	0.926471	122.2	37.71	40.71	-0.108333	0.843206
513	41.29	44.29	-0.161538	0.917357	119.8	37.97	40.97	0.0608696	0.848592
516.9	40.66	43.66	-0.569444	0.904308	117.5	37.83	40.83	-0.0708333	0.845692
520.5	38.61	41.61	-0.816216	0.861848	115.1	38	41	-0.0518519	0.849213
524.2	35.59	38.59	-1.98333	0.799296	112.4	38.14	41.14	-0.0625	0.852113
528.4	27.26	30.26	-1.55	0.626761	110	38.29	41.29	0.165217	0.85522
532.4	21.06	24.06	-1.27879	0.498343	107.7	37.91	40.91	-0.0583333	0.847349
535.7	16.84	19.84	-0.836364	0.410936	105.3	38.05	41.05	0.129167	0.850249
539	14.08	17.08	-0.245946	0.35377	102.9	37.74	40.74	0.025	0.843828
542.7	13.17	16.17	-0.659459	0.334921	100.5	37.68	40.68	0.0952381	0.842585
546.4	10.73	13.73	-0.522222	0.284383	98.4	37.48	40.48	0.0541667	0.838442
550	8.85	11.85	-0.47	0.245443	96	37.35	40.35	0.073913	0.83575
554	6.97	9.97	-0.726471	0.206504	93.7	37.18	40.18	-0.183333	0.832229
557.4	4.5	7.5	-0.38	0.155344	91.3	37.62	40.62	0.0047619	0.841342
561.4	2.98	5.98	-0.2975	0.123861	89.2	37.61	40.61	0.1375	0.841135
565.4	1.79	4.79	-0.43	0.0992129	86.8	37.28	40.28	-0.109524	0.8343
569.4	0.07	3.07	0.0970588	0.0635874	84.7	37.51	40.51	0.0380952	0.839064
572.8	0.4	3.4	-0.30303	0.0704225	82.6	37.43	40.43	0.0666667	0.837407
576.1	-0.6	2.4	0.0529412	0.04971	80.5	37.29	40.29	-0.0857143	0.834507
579.5	-0.42	2.58	0.0560976	0.0534383	78.4	37.47	40.47	-0.177778	0.838235
583.6	-0.19	2.81	-0.12973	0.0582022	76.6	37.79	40.79	0.366667	0.844863
587.3	-0.67	2.33	0.00882353	0.0482601	74.8	37.13	40.13	0.0285714	0.831193
590.7	-0.64	2.36	-0.437838	0.0488815	72.7	37.07	40.07	-0.216667	0.82995
594.4	-2.26	0.74	0.135294	0.0153273	70.9	37.46	40.46	0.0368421	0.838028
597.8	-1.8	1.2	0.0605263	0.024855	69	37.39	40.39	0.0722222	0.836578
601.6	-1.57	1.43	-0.0108108	0.0296189	67.2	37.26	40.26	0.0444444	0.833886
605.3	-1.61	1.39	-0.211429	0.0287904	65.4	37.18	40.18	0.05	0.832229
608.8	-2.35	0.65	0.538889	0.0134631	63.8	37.1	40.1	-0.1375	0.830572
610.6	-1.38	1.62	0.338462	0.0335543	62.2	37.32	40.32	0.166667	0.835128
611.9	-0.94	2.06	-1.96667	0.0426678	60.4	37.02	40.02	-0.253333	0.828915
612.2	-1.53	1.47	-0.00249918	0.0304474	58.9	37.4	40.4	-0.0631579	0.836785
					57	37.52	40.52	0.05	0.839271
					55	37.42	40.42	0.05	0.8372
					52.4	37.29	40.29	-0.00384615	0.834507
					49.8	37.3	40.3	0.0269231	0.834714
					47.2	37.23	40.23	0.00416667	0.833264
					44.8	37.22	40.22	0.047619	0.833057
					42.7	37.12	40.12	0.0555556	0.830986
					40.9	37.02	40.02	-0.0666667	0.828915
					39.4	37.12	40.12	0.942132	0.830986

## Sheet: 738
				Heating HT					Cooling HT
TEMP	CSUSC		1st deriv	knormed				1st deriv	knormed			Mr	Ms	Hcr	Hc	Mrs/Ms	Bcr/Bc	ΔMr/Ms	ΔBcr/Bc
31.1	70.08	73.08	1	1	607.8	-2.01	0.99	0.0555556	0.0135468		BEFORE	0.005047	0.086586	338.074	75.71	0.058	4.46538	0.033	-0.225842
30.8	69.78	72.78	0.0473684	0.995895	606.9	-2.06	0.94	0.305263	0.0128626		AFTER	5.747	63.273	348.346	82.166	0.091	4.23954
32.7	69.87	72.87	0.076	0.997126	605	-2.64	0.36	-0.363636	0.00492611
35.2	70.06	73.06	0.0235294	0.999726	602.8	-1.84	1.16	0.0136364	0.015873
38.6	70.14	73.14	0.141667	1.00082	600.6	-1.87	1.13	0.0761905	0.0154625
42.2	70.65	73.65	0.113514	1.0078	598.5	-2.03	0.97	-0.184	0.0132731
45.9	71.07	74.07	-0.166667	1.01355	596	-1.57	1.43	-0.0785714	0.0195676
49.2	70.52	73.52	0.137838	1.00602	593.2	-1.35	1.65	0.1	0.022578
52.9	71.03	74.03	-0.0470588	1.013	590.4	-1.63	1.37	0.148387	0.0187466
56.3	70.87	73.87	0.0258065	1.01081	587.3	-2.09	0.91	-0.411765	0.0124521
59.4	70.95	73.95	-0.0285714	1.0119	583.9	-0.69	2.31	-0.00294118	0.0316092
62.2	70.87	73.87	0.0592593	1.01081	580.5	-0.68	2.32	0.219355	0.031746
64.9	71.03	74.03	-0.0807692	1.013	577.4	-1.36	1.64	-0.364	0.0224412
67.5	70.82	73.82	0.0434783	1.01013	574.9	-0.45	2.55	-0.103226	0.0348933
69.8	70.92	73.92	0.133333	1.01149	571.8	-0.13	2.87	-0.783333	0.039272
72.2	71.24	74.24	0.0434783	1.01587	568.8	2.22	5.22	-0.858824	0.0714286
74.5	71.34	74.34	0.0125	1.01724	565.4	5.14	8.14	-1.44412	0.111385
76.9	71.37	74.37	-0.0846154	1.01765	562	10.05	13.05	-1.74839	0.178571
79.5	71.15	74.15	-0.191667	1.01464	558.9	15.47	18.47	-1.57647	0.252737		Tc1	Tc2
81.9	70.69	73.69	0.208696	1.00835	555.5	20.83	23.83	-0.796667	0.326081		518.1 / 555.2	562 / 444.7
84.2	71.17	74.17	0.165385	1.01492	552.5	23.22	26.22	-0.405882	0.358785		HPR 1	HPR 2	A40[%]
86.8	71.6	74.6	-0.279167	1.0208	549.1	24.6	27.6	-0.666667	0.377668		-	-	-15.7506
89.2	70.93	73.93	0.346154	1.01163	546.1	26.6	29.6	-0.505882	0.405036		Kmax h	Kmax c
91.8	71.83	74.83	-0.174074	1.02395	542.7	28.32	31.32	0.00666667	0.428571
94.5	71.36	74.36	0.0384615	1.01752	539.7	28.3	31.3	-0.248649	0.428298
97.1	71.46	74.46	0.2	1.01888	536	29.22	32.22	0.0222222	0.440887
99.7	71.98	74.98	-0.258333	1.026	532.4	29.14	32.14	-0.261765	0.439792
102.1	71.36	74.36	0.154167	1.01752	529	30.03	33.03	-0.342424	0.45197
104.5	71.73	74.73	0.125	1.02258	525.7	31.16	34.16	0.0297297	0.467433
106.9	72.03	75.03	-0.0173913	1.02668	522	31.05	34.05	-0.130303	0.465928
109.2	71.99	74.99	-0.103704	1.02614	518.7	31.48	34.48	0.0515152	0.471812
111.9	71.71	74.71	0.0708333	1.0223	515.4	31.31	34.31	0.0545455	0.469485
114.3	71.88	74.88	0.0384615	1.02463	512.1	31.13	34.13	-0.140541	0.467022
116.9	71.98	74.98	0.155556	1.026	508.4	31.65	34.65	-0.230303	0.474138
119.6	72.4	75.4	-0.319231	1.03175	505.1	32.41	35.41	0.00277778	0.484537
122.2	71.57	74.57	0.140741	1.02039	501.5	32.4	35.4	-0.125	0.484401
124.9	71.95	74.95	0.0615385	1.02559	497.9	32.85	35.85	-0.266667	0.490558
127.5	72.11	75.11	-0.01	1.02778	494	33.89	36.89	0.0181818	0.504789
130.5	72.08	75.08	-0.0115385	1.02737	490.7	33.83	36.83	-0.169697	0.503968
133.1	72.05	75.05	-0.266667	1.02696	487.4	34.39	37.39	-0.227778	0.511631
135.8	71.33	74.33	0.133333	1.0171	483.8	35.21	38.21	-0.142424	0.522852
138.5	71.69	74.69	0.315385	1.02203	480.5	35.68	38.68	-0.215625	0.529283
141.1	72.51	75.51	-0.2	1.03325	477.3	36.37	39.37	-0.330556	0.538725
143.5	72.03	75.03	-0.0222222	1.02668	473.7	37.56	40.56	-0.444444	0.555008
146.2	71.97	74.97	0.037037	1.02586	470.1	39.16	42.16	-0.425714	0.576902
148.9	72.07	75.07	0.062963	1.02723	466.6	40.65	43.65	-0.220513	0.597291
151.6	72.24	75.24	0.115385	1.02956	462.7	41.51	44.51	-0.725641	0.609059
154.2	72.54	75.54	-0.122222	1.03366	458.8	44.34	47.34	-0.34	0.647783
156.9	72.21	75.21	0.0666667	1.02915	455.3	45.53	48.53	-0.661111	0.664067
159.6	72.39	75.39	-0.06	1.03161	451.7	47.91	50.91	-0.522857	0.696634
162.6	72.21	75.21	-0.037037	1.02915	448.2	49.74	52.74	-0.488571	0.721675
165.3	72.11	75.11	0.0724138	1.02778	444.7	51.45	54.45	-0.821212	0.745074
168.2	72.32	75.32	-0.0766667	1.03065	441.4	54.16	57.16	-0.68	0.782157
171.2	72.09	75.09	0.170833	1.0275	437.9	56.54	59.54	-0.336364	0.814724
173.6	72.5	75.5	-0.02	1.03311	434.6	57.65	60.65	-0.777143	0.829912
176.6	72.44	75.44	-0.0222222	1.03229	431.1	60.37	63.37	-0.478125	0.867132
179.3	72.38	75.38	0.173333	1.03147	427.9	61.9	64.9	-0.491429	0.888068
182.3	72.9	75.9	-0.296296	1.03859	424.4	63.62	66.62	-0.465789	0.911604
185	72.1	75.1	0.307407	1.02764	420.6	65.39	68.39	-0.0542857	0.935824
187.7	72.93	75.93	0.0740741	1.039	417.1	65.58	68.58	0.0571429	0.938424
190.4	73.13	76.13	0.255556	1.04174	413.6	65.38	68.38	0.0125	0.935687
193.1	73.82	76.82	-0.113333	1.05118	410.4	65.34	68.34	-0.0914286	0.93514
196.1	73.48	76.48	0.00666667	1.04652	406.9	65.66	68.66	0.0714286	0.939518
199.1	73.5	76.5	-0.05	1.0468	403.4	65.41	68.41	-0.286207	0.936097
202.1	73.35	76.35	-0.392593	1.04475	400.5	66.24	69.24	-0.065625	0.947455
204.8	72.29	75.29	0.0833333	1.03024	397.3	66.45	69.45	0.021875	0.950328
207.8	72.54	75.54	0.216667	1.03366	394.1	66.38	69.38	-0.01875	0.949371
210.2	73.06	76.06	0.312903	1.04078	390.9	66.44	69.44	0.191429	0.950192
213.3	74.03	77.03	-0.126667	1.05405	387.4	65.77	68.77	-0.158065	0.941024
216.3	73.65	76.65	0.14	1.04885	384.3	66.26	69.26	0.257143	0.947729
219.3	74.07	77.07	-0.340741	1.0546	380.8	65.36	68.36	-0.0342857	0.935413
222	73.15	76.15	-0.062963	1.04201	377.3	65.48	68.48	0.0258065	0.937055
224.7	72.98	75.98	0.0892857	1.03968	374.2	65.4	68.4	0.0485714	0.935961
227.5	73.23	76.23	-0.228	1.0431	370.7	65.23	68.23	-0.015625	0.933634
230	72.66	75.66	0.2	1.0353	367.5	65.28	68.28	-0.0176471	0.934319
232.7	73.2	76.2	0.142857	1.04269	364.1	65.34	68.34	-0.144118	0.93514
235.5	73.6	76.6	-0.0407407	1.04817	360.7	65.83	68.83	0.215625	0.941845
238.2	73.49	76.49	0.125	1.04666	357.5	65.14	68.14	-0.254839	0.932403
241	73.84	76.84	-0.0259259	1.05145	354.4	65.93	68.93	0.278125	0.943213
243.7	73.77	76.77	0.356	1.05049	351.2	65.04	68.04	-0.380645	0.931034
246.2	74.66	77.66	-0.321429	1.06267	348.1	66.22	69.22	0.075	0.947181
249	73.76	76.76	-0.0766667	1.05036	344.9	65.98	68.98	0.116129	0.943897
252	73.53	76.53	0.380645	1.04721	341.8	65.62	68.62	-0.0205882	0.938971
255.1	74.71	77.71	-0.257576	1.06336	338.4	65.69	68.69	0.132258	0.939929
258.4	73.86	76.86	0.157576	1.05172	335.3	65.28	68.28	-0.346875	0.934319
261.7	74.38	77.38	-0.0545455	1.05884	332.1	66.39	69.39	0.314706	0.949507
265	74.2	77.2	0	1.05638	328.7	65.32	68.32	0	0.934866
268.1	74.2	77.2	0.163636	1.05638	325.6	65.32	68.32	-0.129412	0.934866
271.4	74.74	77.74	0.157143	1.06377	322.2	65.76	68.76	-0.0676471	0.940887
274.2	75.18	78.18	-0.171429	1.06979	318.8	65.99	68.99	0.351613	0.944034
277	74.7	77.7	-0.0928571	1.06322	315.7	64.9	67.9	-0.109677	0.929119
279.8	74.44	77.44	0.0677419	1.05966	312.6	65.24	68.24	-0.354839	0.933771
282.9	74.65	77.65	-0.0933333	1.06253	309.5	66.34	69.34	0.46129	0.948823
285.9	74.37	77.37	0.148387	1.0587	306.4	64.91	67.91	-0.122581	0.929256
289	74.83	77.83	-0.112903	1.065	303.3	65.29	68.29	0.15	0.934455
292.1	74.48	77.48	0.403226	1.06021	299.9	64.78	67.78	-0.353333	0.927477
295.2	75.73	78.73	-0.290323	1.07731	296.9	65.84	68.84	0.320588	0.941981
298.3	74.83	77.83	-0.0580645	1.065	293.5	64.75	67.75	-0.102941	0.927066
301.4	74.65	77.65	0.0777778	1.06253	290.1	65.1	68.1	-0.0133333	0.931856
305	74.93	77.93	-0.245161	1.06637	287.1	65.14	68.14	0.143243	0.932403
308.1	74.17	77.17	0.106452	1.05597	283.4	64.61	67.61	0.0464286	0.925151
311.2	74.5	77.5	0.0558824	1.06048	280.6	64.48	67.48	-0.184848	0.923372
314.6	74.69	77.69	-0.170968	1.06308	277.3	65.09	68.09	0.0935484	0.931719
317.7	74.16	77.16	-0.0205882	1.05583	274.2	64.8	67.8	-0.0969697	0.92775
321.1	74.09	77.09	-0.0225806	1.05487	270.9	65.12	68.12	0.241176	0.932129
324.2	74.02	77.02	-0.264706	1.05391	267.5	64.3	67.3	-0.116667	0.920909
327.6	73.12	76.12	0.258065	1.0416	264.5	64.65	67.65	-0.083871	0.925698
330.7	73.92	76.92	0.0322581	1.05255	261.4	64.91	67.91	0.0777778	0.929256
333.8	74.02	77.02	-0.046875	1.05391	258.7	64.7	67.7	0.0645161	0.926382
337	73.87	76.87	0.0258065	1.05186	255.6	64.5	67.5	-0.135714	0.923645
340.1	73.95	76.95	0.203226	1.05296	252.8	64.88	67.88	0.396	0.928845
343.2	74.58	77.58	-0.178125	1.06158	250.3	63.89	66.89	-0.111111	0.915298
346.4	74.01	77.01	0.248387	1.05378	247.6	64.19	67.19	0.293548	0.919403
349.5	74.78	77.78	-0.309677	1.06431	244.5	63.28	66.28	-0.466667	0.906951
352.6	73.82	76.82	0.0314286	1.05118	241.8	64.54	67.54	0.0964286	0.924193
356.1	73.93	76.93	-0.143243	1.05268	239	64.27	67.27	-0.375	0.920498
359.8	73.4	76.4	0.320588	1.04543	236.6	65.17	68.17	0.248387	0.932813
363.2	74.49	77.49	-0.110526	1.06034	233.5	64.4	67.4	0.337037	0.922277
367	74.07	77.07	0.2	1.0546	230.8	63.49	66.49	-0.0533333	0.909825
370.4	74.75	77.75	-0.148571	1.0639	227.8	63.65	66.65	-0.0785714	0.912014
373.9	74.23	77.23	-0.151613	1.05679	225	63.87	66.87	0.14	0.915025
377	73.76	76.76	-0.117143	1.05036	222	63.45	66.45	0.036	0.909278
380.5	73.35	76.35	0.134375	1.04475	219.5	63.36	66.36	-0.05	0.908046
383.7	73.78	76.78	0.0655172	1.05063	216.5	63.51	66.51	0.07	0.910099
386.6	73.97	76.97	0.0735294	1.05323	213.5	63.3	66.3	-0.0333333	0.907225
390	74.22	77.22	-0.078125	1.05665	210.8	63.39	66.39	0.216667	0.908456
393.2	73.97	76.97	-0.0586207	1.05323	207.8	62.74	65.74	-0.374074	0.899562
396.1	73.8	76.8	-0.253125	1.0509	205.1	63.75	66.75	0.163333	0.913383
399.3	72.99	75.99	-0.003125	1.03982	202.1	63.26	66.26	0.0821429	0.906678
402.5	72.98	75.98	0.217143	1.03968	199.3	63.03	66.03	0.114815	0.90353
406	73.74	76.74	-0.231429	1.05008	196.6	62.72	65.72	-0.425926	0.899288
409.5	72.93	75.93	0.14	1.039	193.9	63.87	66.87	0.13	0.915025
413	73.42	76.42	-0.231429	1.0457	190.9	63.48	66.48	-0.1	0.909688
416.5	72.61	75.61	-0.2375	1.03462	188.2	63.75	66.75	0.211111	0.913383
419.7	71.85	74.85	0.121053	1.02422	185.5	63.18	66.18	0.22963	0.905583
423.5	72.31	75.31	0.01875	1.03051	182.8	62.56	65.56	-0.113333	0.897099
426.7	72.37	75.37	0.105714	1.03134	179.8	62.9	65.9	-0.05	0.901752
430.2	72.74	75.74	-0.0555556	1.0364	177.4	63.02	66.02	0.09	0.903394
433.8	72.54	75.54	-0.102857	1.03366	174.4	62.75	65.75	-0.0111111	0.899699
437.3	72.18	75.18	-0.274286	1.02874	171.7	62.78	65.78	0.296296	0.900109
440.8	71.22	74.22	0.0388889	1.0156	169	61.98	64.98	-0.275	0.889163
444.4	71.36	74.36	0.0428571	1.01752	166.6	62.64	65.64	-0.00740741	0.898194
447.9	71.51	74.51	-0.0457143	1.01957	163.9	62.66	65.66	0.0814815	0.898467
451.4	71.35	74.35	0.0948718	1.01738	161.2	62.44	65.44	-0.00740741	0.895457
455.3	71.72	74.72	-0.181579	1.02244	158.5	62.46	65.46	0.2	0.895731
459.1	71.03	74.03	-0.0242424	1.013	156.1	61.98	64.98	0.0296296	0.889163
462.4	70.95	73.95	-0.0435897	1.0119	153.4	61.9	64.9	-0.296154	0.888068
466.3	70.78	73.78	0.0815789	1.00958	150.8	62.67	65.67	0.218519	0.898604
470.1	71.09	74.09	0.115385	1.01382	148.1	62.08	65.08	-0.0518519	0.890531
474	71.54	74.54	-0.141026	1.01998	145.4	62.22	65.22	0.162963	0.892447
477.9	70.99	73.99	0	1.01245	142.7	61.78	64.78	0.0724138	0.886426
481.4	70.99	73.99	-0.280556	1.01245	139.8	61.57	64.57	0.0206897	0.883552
485	69.98	72.98	0.0305556	0.998632	136.9	61.51	64.51	-0.237037	0.882731
488.6	70.09	73.09	-0.105556	1.00014	134.2	62.15	65.15	0.348276	0.891489
492.2	69.71	72.71	-0.244444	0.994937	131.3	61.14	64.14	0.0666667	0.877668
495.8	68.83	71.83	-0.151282	0.982895	128.6	60.96	63.96	0.174074	0.875205
499.7	68.24	71.24	0.128205	0.974822	125.9	60.49	63.49	-0.284615	0.868774
503.6	68.74	71.74	-0.458974	0.981664	123.3	61.23	64.23	0.133333	0.8789
507.5	66.95	69.95	-0.0558824	0.95717	120.6	60.87	63.87	-0.145833	0.873974
510.9	66.76	69.76	-0.833333	0.95457	118.2	61.22	64.22	0.0461538	0.878763
514.5	63.76	66.76	-2.33056	0.913519	115.6	61.1	64.1	0.0708333	0.877121
518.1	55.37	58.37	-2.96923	0.798714	113.2	60.93	63.93	-0.295833	0.874795
522	43.79	46.79	-2.07297	0.640257	110.8	61.64	64.64	0.286957	0.88451
525.7	36.12	39.12	-1.24444	0.535304	108.5	60.98	63.98	-0.00416667	0.875479
529.3	31.64	34.64	-0.4175	0.474001	106.1	60.99	63.99	-0.0925926	0.875616
533.3	29.97	32.97	-0.248718	0.451149	103.4	61.24	64.24	0.334783	0.879037
537.2	29	32	-0.564706	0.437876	101.1	60.47	63.47	0.116667	0.8685
540.6	27.08	30.08	-0.548718	0.411604	98.7	60.19	63.19	-0.279167	0.864669
544.5	24.94	27.94	-0.152941	0.382321	96.3	60.86	63.86	0.0428571	0.873837
547.9	24.42	27.42	-0.821622	0.375205	94.2	60.77	63.77	0.0583333	0.872605
551.6	21.38	24.38	-0.536111	0.333607	91.8	60.63	63.63	0.157143	0.87069
555.2	19.45	22.45	-1.89412	0.307198	89.7	60.3	63.3	-0.0380952	0.866174
558.6	13.01	16.01	-1.1	0.219075	87.6	60.38	63.38	-0.0142857	0.867269
562	9.27	12.27	-1.49412	0.167898	85.5	60.41	63.41	0.228571	0.867679
565.4	4.19	7.19	-0.511765	0.0983853	83.4	59.93	62.93	0.0722222	0.861111
568.8	2.45	5.45	-0.748485	0.0745758	81.6	59.8	62.8	-0.155556	0.859332
572.1	-0.02	2.98	-0.154054	0.0407772	79.8	60.08	63.08	0.295238	0.863164
575.8	-0.59	2.41	0.072973	0.0329776	77.7	59.46	62.46	-0.4	0.85468
579.5	-0.32	2.68	-0.197727	0.0366721	75.8	60.22	63.22	0.105556	0.865079
583.9	-1.19	1.81	-0.065	0.0247674	74	60.03	63.03	0.144444	0.862479
587.9	-1.45	1.55	0.245946	0.0212096	72.2	59.77	62.77	-0.0473684	0.858922
591.6	-0.54	2.46	-0.191176	0.0336617	70.3	59.86	62.86	-0.0166667	0.860153
595	-1.19	1.81	-0.0375	0.0247674	68.5	59.89	62.89	0.138889	0.860564
598.2	-1.31	1.69	-0.174194	0.0231253	66.7	59.64	62.64	0.1625	0.857143
601.3	-1.85	1.15	0.258065	0.0157362	65.1	59.38	62.38	-0.0722222	0.853585
604.4	-1.05	1.95	-0.318182	0.0266831	63.3	59.51	62.51	0.0888889	0.855364
606.6	-1.75	1.25	0.608333	0.0171045	61.5	59.35	62.35	0.2125	0.853175
607.8	-1.02	1.98	-2.2	0.0270936	59.9	59.01	62.01	-0.195238	0.848522
608.4	-2.34	0.66	-0.00384615	0.0090312	57.8	59.42	62.42	0.0869565	0.854132
					55.5	59.22	62.22	0.05	0.851396
					52.9	59.09	62.09	0.0346154	0.849617
					50.3	59	62	0.0269231	0.848385
					47.7	58.93	61.93	0.00384615	0.847427
					45.1	58.92	61.92	0.047619	0.847291
					43	58.82	61.82	0	0.845922
					41.2	58.82	61.82	0.111111	0.845922
					39.4	58.62	61.62	1.48782	0.843186

## Sheet: 744
				Heating HT					Cooling HT
TEMP	CSUSC		1st deriv	knormed				1st deriv	knormed			Mr	Ms	Hcr	Hc	Mrs/Ms	Bcr/Bc	ΔMr/Ms	ΔBcr/Bc
30.8	99.18	102.18	0.666667	1	610	-1.44	1.56	0.0875	0.0152672		BEFORE	5.044	99.187	311.867	42.11	0.051	7.40601	0.03	-4.08076
31.1	99.38	102.38	-0.19375	1.00196	608.4	-1.58	1.42	-0.111111	0.013897		AFTER	7.18	88.7	201.746	60.671	0.081	3.32525
32.7	99.07	102.07	0.178571	0.998923	606.6	-1.38	1.62	-0.00454545	0.0158544
35.5	99.57	102.57	0.105556	1.00382	604.4	-1.37	1.63	0.328	0.0159522
39.1	99.95	102.95	0.225641	1.00754	601.9	-2.19	0.81	-0.396	0.00792719
43	100.83	103.83	-0.0025641	1.01615	599.4	-1.2	1.8	0.228571	0.017616
46.9	100.82	103.82	0.138889	1.01605	596.6	-1.84	1.16	0.167857	0.0113525
50.5	101.32	104.32	0.158824	1.02094	593.8	-2.31	0.69	-0.346429	0.00675279
53.9	101.86	104.86	-0.0294118	1.02623	591	-1.34	1.66	-0.107143	0.0162458
57.3	101.76	104.76	0.309677	1.02525	588.2	-1.04	1.96	-0.111765	0.0191818
60.4	102.72	105.72	-0.148276	1.03464	584.8	-0.66	2.34	-0.471429	0.0229008
63.3	102.29	105.29	0.0807692	1.03044	582	0.66	3.66	-0.473529	0.0358191
65.9	102.5	105.5	0.144828	1.03249	578.6	2.27	5.27	-1.37857	0.0515757
68.8	102.92	105.92	-0.0695652	1.0366	575.8	6.13	9.13	-1.26	0.0893521
71.1	102.76	105.76	-0.00384615	1.03504	572.8	9.91	12.91	-1.12258	0.126346
73.7	102.75	105.75	0.291667	1.03494	569.7	13.39	16.39	-1.14706	0.160403
76.1	103.45	106.45	-0.226923	1.04179	566.3	17.29	20.29	-1.13548	0.198571
78.7	102.86	105.86	0.358333	1.03601	563.2	20.81	23.81	-0.814706	0.23302
81.1	103.72	106.72	-0.0130435	1.04443	559.8	23.58	26.58	-0.916667	0.260129
83.4	103.69	106.69	0.0541667	1.04414	556.8	26.33	29.33	-0.803226	0.287042		Tc1	Tc2
85.8	103.82	106.82	0.229167	1.04541	553.7	28.82	31.82	-0.655882	0.311411		513.3 / 570.9	578.6 / 453.8
88.2	104.37	107.37	0.146154	1.05079	550.3	31.05	34.05	-0.763636	0.333235		HPR 1	HPR 2	A40[%]
90.8	104.75	107.75	0.116667	1.05451	547	33.57	36.57	-0.767568	0.357898		-	-	-15.7649
93.2	105.03	108.03	-0.176923	1.05725	543.3	36.41	39.41	-0.633333	0.385692		Kmax h	Kmax c
95.8	104.57	107.57	0.123077	1.05275	540	38.5	41.5	-0.789189	0.406146
98.4	104.89	107.89	0.0166667	1.05588	536.3	41.42	44.42	-0.644444	0.434723
100.8	104.93	107.93	-0.125	1.05627	532.7	43.74	46.74	-0.617647	0.457428
103.2	104.63	107.63	0.326087	1.05334	529.3	45.84	48.84	-0.642424	0.47798
105.5	105.38	108.38	0.296296	1.06068	526	47.96	50.96	-0.351351	0.498728
108.2	106.18	109.18	0.0791667	1.06851	522.3	49.26	52.26	-0.533333	0.51145
110.6	106.37	109.37	0.0846154	1.07037	518.7	51.18	54.18	-0.341667	0.530241
113.2	106.59	109.59	-0.141667	1.07252	515.1	52.41	55.41	-0.477778	0.542278
115.6	106.25	109.25	0.226923	1.06919	511.5	54.13	57.13	-0.3	0.559111
118.2	106.84	109.84	0.0222222	1.07497	508.1	55.15	58.15	-0.580556	0.569094
120.9	106.9	109.9	0.210345	1.07555	504.5	57.24	60.24	-0.439394	0.589548
123.8	107.51	110.51	-0.116667	1.08152	501.2	58.69	61.69	-0.290909	0.603739
126.2	107.23	110.23	0.12963	1.07878	497.9	59.65	62.65	-0.236111	0.613134
128.9	107.58	110.58	-0.0551724	1.08221	494.3	60.5	63.5	-0.416667	0.621452
131.8	107.42	110.42	-0.0962963	1.08064	491.3	61.75	64.75	-0.4	0.633686
134.5	107.16	110.16	0.0461538	1.0781	487.7	63.19	66.19	-0.366667	0.647778
137.1	107.28	110.28	0.32963	1.07927	484.4	64.4	67.4	-0.35	0.65962
139.8	108.17	111.17	-0.0111111	1.08798	481.4	65.45	68.45	-0.505263	0.669896
142.5	108.14	111.14	0.0192308	1.08769	477.6	67.37	70.37	-0.497222	0.688687
145.1	108.19	111.19	-0.0592593	1.08818	474	69.16	72.16	-0.512121	0.706205
147.8	108.03	111.03	0.323333	1.08661	470.7	70.85	73.85	-0.475	0.722744
150.8	109	112	-0.0615385	1.0961	467.1	72.56	75.56	-0.52069	0.739479
153.4	108.84	111.84	0.0259259	1.09454	464.2	74.07	77.07	-0.502778	0.754257
156.1	108.91	111.91	0.137037	1.09522	460.6	75.88	78.88	-0.40625	0.771971
158.8	109.28	112.28	-0.125926	1.09885	457.4	77.18	80.18	-0.558333	0.784694
161.5	108.94	111.94	0.122222	1.09552	453.8	79.19	82.19	-0.563158	0.804365
164.2	109.27	112.27	-0.185185	1.09875	450	81.33	84.33	-0.461905	0.825308
166.9	108.77	111.77	0.203448	1.09385	445.8	83.27	86.27	-0.347368	0.844294
169.8	109.36	112.36	-0.28	1.09963	442	84.59	87.59	-0.365625	0.857213
172.8	108.52	111.52	0.36	1.09141	438.8	85.76	88.76	-0.336111	0.868663
175.8	109.6	112.6	0.162069	1.10198	435.2	86.97	89.97	-0.345714	0.880505
178.7	110.07	113.07	-0.0533333	1.10658	431.7	88.18	91.18	-0.370732	0.892347
181.7	109.91	112.91	-0.3	1.10501	427.6	89.7	92.7	-0.145714	0.907223
184.7	109.01	112.01	0.111111	1.0962	424.1	90.21	93.21	-0.473684	0.912214
187.4	109.31	112.31	0.273333	1.09914	420.3	92.01	95.01	-0.158537	0.92983
190.4	110.13	113.13	0.107407	1.10716	416.2	92.66	95.66	-0.222857	0.936191
193.1	110.42	113.42	-0.0133333	1.11	412.7	93.44	96.44	-0.28125	0.943825
196.1	110.38	113.38	-0.06	1.10961	409.5	94.34	97.34	-0.251724	0.952633
199.1	110.2	113.2	0.0555556	1.10785	406.6	95.07	98.07	-0.23125	0.959777
201.8	110.35	113.35	0.318519	1.10932	403.4	95.81	98.81	-0.2	0.967019
204.5	111.21	114.21	-0.533333	1.11773	400.2	96.45	99.45	-0.25625	0.973282
207.2	109.77	112.77	0.0678571	1.10364	397	97.27	100.27	-0.0657143	0.981307
210	109.96	112.96	0.17037	1.1055	393.5	97.5	100.5	-0.35625	0.983558
212.7	110.42	113.42	0.31	1.11	390.3	98.64	101.64	0.238235	0.994715
215.7	111.35	114.35	-0.263333	1.1191	386.9	97.83	100.83	-0.23125	0.986788
218.7	110.56	113.56	0.3	1.11137	383.7	98.57	101.57	-0.0655172	0.99403
221.7	111.46	114.46	-0.126667	1.12018	380.8	98.76	101.76	0.046875	0.99589
224.7	111.08	114.08	-0.196429	1.11646	377.6	98.61	101.61	-0.121875	0.994422
227.5	110.53	113.53	0.133333	1.11108	374.4	99	102	0.0205882	0.998238
230.5	110.93	113.93	0.175	1.11499	371	98.93	101.93	-0.128571	0.997553
233.3	111.42	114.42	0.037037	1.11979	367.5	99.38	102.38	-0.0470588	1.00196
236	111.52	114.52	0.33	1.12077	364.1	99.54	102.54	0.0617647	1.00352
239	112.51	115.51	-0.348387	1.13046	360.7	99.33	102.33	-0.0714286	1.00147
242.1	111.43	114.43	0.214815	1.11989	357.2	99.58	102.58	-0.0258065	1.00391
244.8	112.01	115.01	0.125	1.12556	354.1	99.66	102.66	-0.108571	1.0047
247.6	112.36	115.36	-0.0444444	1.12899	350.6	100.04	103.04	0.167742	1.00842
250.3	112.24	115.24	0.171429	1.12781	347.5	99.52	102.52	-0.0548387	1.00333
253.1	112.72	115.72	-0.235484	1.13251	344.4	99.69	102.69	0.05625	1.00499
256.2	111.99	114.99	0.286667	1.12537	341.2	99.51	102.51	-0.16129	1.00323
259.2	112.85	115.85	0.0878788	1.13378	338.1	100.01	103.01	0.308824	1.00812
262.5	113.14	116.14	-0.0777778	1.13662	334.7	98.96	101.96	-0.252941	0.997847
266.1	112.86	115.86	0.114706	1.13388	331.3	99.82	102.82	0.15	1.00626
269.5	113.25	116.25	0.17	1.1377	327.9	99.31	102.31	0.00322581	1.00127
272.5	113.76	116.76	-0.016129	1.14269	324.8	99.3	102.3	-0.116129	1.00117
275.6	113.71	116.71	-0.0428571	1.1422	321.7	99.66	102.66	0.115625	1.0047
278.4	113.59	116.59	0.0535714	1.14103	318.5	99.29	102.29	0.00322581	1.00108
281.2	113.74	116.74	0.167857	1.14249	315.4	99.28	102.28	0.112903	1.00098
284	114.21	117.21	0.064	1.14709	312.3	98.93	101.93	-0.103226	0.997553
286.5	114.37	117.37	0.0928571	1.14866	309.2	99.25	102.25	0.0483871	1.00069
289.3	114.63	117.63	0.0483871	1.1512	306.1	99.1	102.1	0.103226	0.999217
292.4	114.78	117.78	0.241935	1.15267	303	98.78	101.78	-0.207143	0.996085
295.5	115.53	118.53	-0.121212	1.16001	300.2	99.36	102.36	0.218182	1.00176
298.8	115.13	118.13	0.0382353	1.1561	296.9	98.64	101.64	-0.0617647	0.994715
302.2	115.26	118.26	0.135135	1.15737	293.5	98.85	101.85	0.0735294	0.99677
305.9	115.76	118.76	-0.342424	1.16226	290.1	98.6	101.6	-0.00606061	0.994324
309.2	114.63	117.63	0.222581	1.1512	286.8	98.62	101.62	0.16129	0.994519
312.3	115.32	118.32	0.145161	1.15796	283.7	98.12	101.12	0.00882353	0.989626
315.4	115.77	118.77	-0.2	1.16236	280.3	98.09	101.09	-0.0037037	0.989333
318.8	115.09	118.09	-0.102941	1.15571	277.6	98.1	101.1	0.0645161	0.98943
322.2	114.74	117.74	-0.0441176	1.15228	274.5	97.9	100.9	-0.0387097	0.987473
325.6	114.59	117.59	0.238235	1.15081	271.4	98.02	101.02	0.08	0.988647
329	115.4	118.4	0.118919	1.15874	268.4	97.78	100.78	0.0806452	0.986299
332.7	115.84	118.84	-0.1	1.16305	265.3	97.53	100.53	0.0466667	0.983852
335.8	115.53	118.53	0.102941	1.16001	262.3	97.39	100.39	0.0129032	0.982482
339.2	115.88	118.88	-0.01875	1.16344	259.2	97.35	100.35	0.0833333	0.98209
342.4	115.82	118.82	0.232258	1.16285	256.2	97.1	100.1	0.0357143	0.979644
345.5	116.54	119.54	-0.203125	1.1699	253.4	97	100	0.107143	0.978665
348.7	115.89	118.89	0.0382353	1.16353	250.6	96.7	99.7	0	0.975729
352.1	116.02	119.02	-0.00294118	1.16481	248.1	96.7	99.7	0.00416667	0.975729
355.5	116.01	119.01	0.0352941	1.16471	245.7	96.69	99.69	0.0928571	0.975631
358.9	116.13	119.13	0.384375	1.16588	242.9	96.43	99.43	0.004	0.973087
362.1	117.36	120.36	-0.196875	1.17792	240.4	96.42	99.42	0.0259259	0.972989
365.3	116.73	119.73	0.170588	1.17176	237.7	96.35	99.35	0.217857	0.972304
368.7	117.31	120.31	-0.12069	1.17743	234.9	95.74	98.74	-0.044	0.966334
371.6	116.96	119.96	-0.05	1.17401	232.4	95.85	98.85	0.0866667	0.96741
374.4	116.82	119.82	0.0125	1.17264	229.4	95.59	98.59	-0.0333333	0.964866
377.6	116.86	119.86	0.272414	1.17303	226.7	95.68	98.68	0.0571429	0.965747
380.5	117.65	120.65	0.040625	1.18076	223.9	95.52	98.52	0.08	0.964181
383.7	117.78	120.78	-0.471875	1.18203	220.9	95.28	98.28	0.0266667	0.961832
386.9	116.27	119.27	0.403226	1.16725	217.9	95.2	98.2	0.0766667	0.961049
390	117.52	120.52	-0.357143	1.17949	214.9	94.97	97.97	0.0592593	0.958798
393.5	116.27	119.27	0.046875	1.16725	212.2	94.81	97.81	0.075	0.957232
396.7	116.42	119.42	0.0368421	1.16872	209.4	94.6	97.6	0.103333	0.955177
400.5	116.56	119.56	-0.105714	1.17009	206.4	94.29	97.29	0.0666667	0.952143
404	116.19	119.19	-0.481081	1.16647	203.7	94.11	97.11	-0.0407407	0.950382
407.7	114.41	117.41	0.313158	1.14905	201	94.22	97.22	0.0866667	0.951458
411.5	115.6	118.6	-0.239024	1.1607	198	93.96	96.96	0.0766667	0.948914
415.6	114.62	117.62	0.159375	1.15111	195	93.73	96.73	0.00740741	0.946663
418.8	115.13	118.13	-0.0828571	1.1561	192.3	93.71	96.71	0.05	0.946467
422.3	114.84	117.84	-0.0257143	1.15326	189.3	93.56	96.56	0.0851852	0.944999
425.8	114.75	117.75	-0.215152	1.15238	186.6	93.33	96.33	0.166667	0.942748
429.1	114.04	117.04	-0.108571	1.14543	183.9	92.88	95.88	0.0555556	0.938344
432.6	113.66	116.66	0.15625	1.14171	181.2	92.73	95.73	0.0222222	0.936876
435.8	114.16	117.16	-0.394444	1.1466	178.5	92.67	95.67	0.0925926	0.936289
439.4	112.74	115.74	0.115625	1.13271	175.8	92.42	95.42	0.136667	0.933842
442.6	113.11	116.11	-0.13125	1.13633	172.8	92.01	95.01	-0.0966667	0.92983
445.8	112.69	115.69	-0.0944444	1.13222	169.8	92.3	95.3	0.155556	0.932668
449.4	112.35	115.35	0	1.12889	167.1	91.88	94.88	0.141667	0.928557
452.9	112.35	115.35	-0.183333	1.12889	164.7	91.54	94.54	-0.0592593	0.92523
456.5	111.69	114.69	-0.16875	1.12243	162	91.7	94.7	0.0740741	0.926796
459.7	111.15	114.15	0.0805556	1.11715	159.3	91.5	94.5	0.0115385	0.924839
463.3	111.44	114.44	-0.363889	1.11998	156.7	91.47	94.47	0.123333	0.924545
466.9	110.13	113.13	-0.125714	1.10716	153.7	91.1	94.1	0.0208333	0.920924
470.4	109.69	112.69	-0.0138889	1.10286	151.3	91.05	94.05	0.0444444	0.920435
474	109.64	112.64	-0.425	1.10237	148.6	90.93	93.93	0.0666667	0.91926
477.6	108.11	111.11	-0.408571	1.08739	145.9	90.75	93.75	-0.0655172	0.917499
481.1	106.68	109.68	-0.525	1.0734	143	90.94	93.94	0.218519	0.919358
484.7	104.79	107.79	-1.10833	1.0549	140.3	90.35	93.35	0.158621	0.913584
488.3	100.8	103.8	-1.35833	1.01585	137.4	89.89	92.89	0	0.909082
491.9	95.91	98.91	-1.35833	0.967998	135	89.89	92.89	0.0965517	0.909082
495.5	91.02	94.02	-1.08611	0.920141	132.1	89.61	92.61	0.1	0.906342
499.1	87.11	90.11	-1.26923	0.881875	129.4	89.34	92.34	0.0625	0.903699
503	82.16	85.16	-1.05	0.833431	127	89.19	92.19	-0.0115385	0.902231
506.6	78.38	81.38	-1.12121	0.796438	124.4	89.22	92.22	0.192593	0.902525
509.9	74.68	77.68	-1.20294	0.760227	121.7	88.7	91.7	0.00833333	0.897436
513.3	70.59	73.59	-1.48056	0.7202	119.3	88.68	91.68	-0.00689655	0.89724
516.9	65.26	68.26	-1.34722	0.668037	116.4	88.7	91.7	0.075	0.897436
520.5	60.41	63.41	-1.11	0.620572	114	88.52	91.52	0.209524	0.895674
524.5	55.97	58.97	-1	0.577119	111.9	88.08	91.08	-0.103704	0.891368
528.1	52.37	55.37	-0.769767	0.541887	109.2	88.36	91.36	0.147826	0.894108
532.4	49.06	52.06	-0.92619	0.509493	106.9	88.02	91.02	0.0333333	0.890781
536.6	45.17	48.17	-0.788372	0.471423	104.5	87.94	90.94	0.062963	0.889998
540.9	41.78	44.78	-0.712121	0.438246	101.8	87.77	90.77	0.1	0.888334
544.2	39.43	42.43	-0.732432	0.415248	99.2	87.51	90.51	0.165385	0.88579
547.9	36.72	39.72	-0.7325	0.388726	96.6	87.08	90.08	0.0458333	0.881582
551.9	33.79	36.79	-1.03889	0.360051	94.2	86.97	89.97	0.0166667	0.880505
555.5	30.05	33.05	-0.985	0.323449	91.8	86.93	89.93	0.0565217	0.880114
559.5	26.11	29.11	-0.9375	0.284889	89.5	86.8	89.8	0.0105263	0.878841
563.5	22.36	25.36	-1.26216	0.248189	87.6	86.78	89.78	0.0333333	0.878646
567.2	17.69	20.69	-1.34865	0.202486	85.5	86.71	89.71	0.180952	0.87796
570.9	12.7	15.7	-1.36471	0.15365	83.4	86.33	89.33	0.0142857	0.874242
574.3	8.06	11.06	-0.961765	0.10824	81.3	86.3	89.3	0.122222	0.873948
577.7	4.79	7.79	-0.813514	0.076238	79.5	86.08	89.08	0.0666667	0.871795
581.4	1.78	4.78	-0.208824	0.0467802	77.7	85.96	88.96	0.0210526	0.87062
584.8	1.07	4.07	-0.388235	0.0398317	75.8	85.92	88.92	0.05	0.870229
588.2	-0.25	2.75	0.0354839	0.0269133	74	85.83	88.83	-0.0875	0.869348
591.3	-0.14	2.86	-0.244118	0.0279898	72.4	85.97	88.97	0.172222	0.870718
594.7	-0.97	2.03	-0.106452	0.0198669	70.6	85.66	88.66	0.0388889	0.867684
597.8	-1.3	1.7	-0.0184211	0.0166373	68.8	85.59	88.59	0.08125	0.866999
601.6	-1.37	1.63	0.141935	0.0159522	67.2	85.46	88.46	0.211111	0.865727
604.7	-0.93	2.07	-0.272	0.0202584	65.4	85.08	88.08	0.0421053	0.862008
607.2	-1.61	1.39	0.236842	0.0136034	63.5	85	88	0.04	0.861225
609.1	-1.16	1.84	-0.8	0.0180074	62	84.94	87.94	0.0111111	0.860638
610	-1.88	1.12	1.33333	0.010961	60.2	84.92	87.92	0	0.860442
610.6	-1.08	1.92	-0.00176875	0.0187904	58.6	84.92	87.92	0	0.860442
					56.8	84.92	87.92	0.125	0.860442
					54.4	84.62	87.62	0.0565217	0.857506
					52.1	84.49	87.49	0.111538	0.856234
					49.5	84.2	87.2	0.0304348	0.853396
					47.2	84.13	87.13	0.0458333	0.852711
					44.8	84.02	87.02	0.0952381	0.851634
					42.7	83.82	86.82	0.133333	0.849677
					41.2	83.62	86.62	-0.0625	0.84772
					39.6	83.72	86.72	2.11414	0.848698

## Sheet: 747
				Heating HT					Cooling HT
TEMP	CSUSC		1st deriv	knormed				1st deriv	knormed			Mr	Ms	Hcr	Hc	Mrs/Ms	Bcr/Bc	ΔMr/Ms	ΔBcr/Bc
26.7	4	7	-0.333333	1	608.8	-1.55	1.45	1.35714	0.207143		BEFORE	0.524726	8.713	361.606	81.537	0.06	4.43487	0.003	-0.521712
27	3.9	6.9	0.02	0.985714	608.1	-2.5	0.5	-0.955556	0.0714286		AFTER	0.505444	8.049	306.549	78.338	0.063	3.91316
29	3.94	6.94	0.203226	0.991429	607.2	-1.64	1.36	0.157895	0.194286
32.1	4.57	7.57	-0.0810811	1.08143	605.3	-1.94	1.06	0.28	0.151429
35.8	4.27	7.27	0.102632	1.03857	602.8	-2.64	0.36	-0.486364	0.0514286
39.6	4.66	7.66	-0.0621622	1.09429	600.6	-1.57	1.43	0.314286	0.204286
43.3	4.43	7.43	0.0769231	1.06143	598.5	-2.23	0.77	-0.184	0.11
47.2	4.73	7.73	-0.0861111	1.10429	596	-1.77	1.23	0.242857	0.175714
50.8	4.42	7.42	0.102941	1.06	593.2	-2.45	0.55	-0.2	0.0785714
54.2	4.77	7.77	-0.0677419	1.11	590.1	-1.83	1.17	-0.0823529	0.167143
57.3	4.56	7.56	0.0193548	1.08	586.7	-1.55	1.45	-0.544118	0.207143
60.4	4.62	7.62	0.0586207	1.08857	583.3	0.3	3.3	-0.507143	0.471429
63.3	4.79	7.79	-0.188462	1.11286	580.5	1.72	4.72	-0.326471	0.674286
65.9	4.3	7.3	0.238462	1.04286	577.1	2.83	5.83	-0.279412	0.832857
68.5	4.92	7.92	-0.1875	1.13143	573.7	3.78	6.78	0.0588235	0.968571
70.9	4.47	7.47	0.165217	1.06714	570.3	3.58	6.58	-0.103226	0.94
73.2	4.85	7.85	-0.196154	1.12143	567.2	3.9	6.9	-0.283871	0.985714
75.8	4.34	7.34	0.0846154	1.04857	564.1	4.78	7.78	0.0966667	1.11143
78.4	4.56	7.56	-0.0916667	1.08	561.1	4.49	7.49	-0.13871	1.07
80.8	4.34	7.34	-0.0625	1.04857	558	4.92	7.92	-0.0588235	1.13143		Tc1	Tc2
83.2	4.19	7.19	0.265217	1.02714	554.6	5.12	8.12	0.212121	1.16		581.1	586.7
85.5	4.8	7.8	-0.129167	1.11429	551.3	4.42	7.42	0.0205882	1.06		HPR 1	HPR 2	A40[%]
87.9	4.49	7.49	0.05	1.07	547.9	4.35	7.35	-0.0823529	1.05		-	-	-9.66057
90.3	4.61	7.61	0	1.08714	544.5	4.63	7.63	0.03	1.09		Kmax h	Kmax c
92.6	4.61	7.61	0.0708333	1.08714	541.5	4.54	7.54	-0.0214286	1.07714
95	4.78	7.78	-0.141667	1.11143	538.7	4.6	7.6	-0.0433333	1.08571
97.4	4.44	7.44	-0.026087	1.06286	535.7	4.73	7.73	-0.07	1.10429
99.7	4.38	7.38	0.116667	1.05429	532.7	4.94	7.94	-0.0588235	1.13429
102.1	4.66	7.66	-0.00740741	1.09429	529.3	5.14	8.14	0.133333	1.16286
104.8	4.64	7.64	0.196154	1.09143	525.7	4.66	7.66	0.0297297	1.09429
107.4	5.15	8.15	-0.0807692	1.16429	522	4.55	7.55	-0.0589744	1.07857
110	4.94	7.94	-0.0137931	1.13429	518.1	4.78	7.78	-0.190909	1.11143
112.9	4.9	7.9	-0.0185185	1.12857	514.8	5.41	8.41	0.26	1.20143
115.6	4.85	7.85	-0.119231	1.12143	511.8	4.63	7.63	-0.2	1.09
118.2	4.54	7.54	-0.0133333	1.07714	508.7	5.25	8.25	0.0666667	1.17857
121.2	4.5	7.5	0.119231	1.07143	505.1	5.01	8.01	0.0305556	1.14429
123.8	4.81	7.81	-0.0310345	1.11571	501.5	4.9	7.9	-0.163636	1.12857
126.7	4.72	7.72	-0.116667	1.10286	498.2	5.44	8.44	0.288889	1.20571
129.7	4.37	7.37	-0.0153846	1.05286	494.6	4.4	7.4	-0.19697	1.05714
132.3	4.33	7.33	0.236667	1.04714	491.3	5.05	8.05	0.155556	1.15
135.3	5.04	8.04	-0.326923	1.14857	487.7	4.49	7.49	-0.154545	1.07
137.9	4.19	7.19	0.151852	1.02714	484.4	5	8	0.416667	1.14286
140.6	4.6	7.6	0.0103448	1.08571	481.4	3.75	6.75	-0.348571	0.964286
143.5	4.63	7.63	-0.0533333	1.09	477.9	4.97	7.97	0.0636364	1.13857
146.5	4.47	7.47	0.114815	1.06714	474.6	4.76	7.76	-0.025	1.10857
149.2	4.78	7.78	0.0269231	1.11143	471	4.85	7.85	0.172727	1.12143
151.8	4.85	7.85	-0.00333333	1.12143	467.7	4.28	7.28	-0.254286	1.04
154.8	4.84	7.84	0.0592593	1.12	464.2	5.17	8.17	0.239394	1.16714
157.5	5	8	0.0241379	1.14286	460.9	4.38	7.38	-0.111429	1.05429
160.4	5.07	8.07	-0.0925926	1.15286	457.4	4.77	7.77	-0.00555556	1.11
163.1	4.82	7.82	-0.17037	1.11714	453.8	4.79	7.79	-0.148276	1.11286
165.8	4.36	7.36	0.06	1.05143	450.9	5.22	8.22	0.263636	1.17429
168.8	4.54	7.54	-0.0259259	1.07714	447.6	4.35	7.35	-0.137143	1.05
171.5	4.47	7.47	0.0851852	1.06714	444.1	4.83	7.83	-0.069697	1.11857
174.2	4.7	7.7	-0.0172414	1.1	440.8	5.06	8.06	0.1	1.15143
177.1	4.65	7.65	0.123333	1.09286	437.6	4.74	7.74	-0.03125	1.10571
180.1	5.02	8.02	-0.09	1.14571	434.4	4.84	7.84	-0.116667	1.12
183.1	4.75	7.75	0.262069	1.10714	430.8	5.26	8.26	0.302632	1.18
186	5.51	8.51	-0.392857	1.21571	427	4.11	7.11	-0.21875	1.01571
188.8	4.41	7.41	0.224138	1.05857	423.8	4.81	7.81	0.225	1.11571
191.7	5.06	8.06	-0.19	1.15143	420.6	4.09	7.09	-0.14	1.01286
194.7	4.49	7.49	0.07	1.07	417.1	4.58	7.58	0.025	1.08286
197.7	4.7	7.7	0.13	1.1	413.9	4.5	7.5	-0.0466667	1.07143
200.7	5.09	8.09	-0.116667	1.15571	410.9	4.64	7.64	0.0625	1.09143
203.7	4.74	7.74	-0.0166667	1.10571	407.7	4.44	7.44	-0.0648649	1.06286
206.7	4.69	7.69	-0.0925926	1.09857	404	4.68	7.68	-0.131429	1.09714
209.4	4.44	7.44	0.128571	1.06286	400.5	5.14	8.14	0.02	1.16286
212.2	4.8	7.8	-0.0533333	1.11429	397	5.07	8.07	-0.00625	1.15286
215.2	4.64	7.64	0.128125	1.09143	393.8	5.09	8.09	0.015625	1.15571
218.4	5.05	8.05	-0.0612903	1.15	390.6	5.04	8.04	0.084375	1.14857
221.5	4.86	7.86	-0.062963	1.12286	387.4	4.77	7.77	-0.125806	1.11
224.2	4.69	7.69	-0.109091	1.09857	384.3	5.16	8.16	0.003125	1.16571
227.5	4.33	7.33	-0.1	1.04714	381.1	5.15	8.15	0.00625	1.16429
230.5	4.03	7.03	0.296667	1.00429	377.9	5.13	8.13	0.237143	1.16143
233.5	4.92	7.92	-0.0258065	1.13143	374.4	4.3	7.3	-0.0970588	1.04286
236.6	4.84	7.84	0.103704	1.12	371	4.63	7.63	0.04375	1.09
239.3	5.12	8.12	0.07	1.16	367.8	4.49	7.49	0.0117647	1.07
242.3	5.33	8.33	-0.00357143	1.19	364.4	4.45	7.45	-0.105714	1.06429
245.1	5.32	8.32	-0.128571	1.18857	360.9	4.82	7.82	0.170588	1.11714
247.9	4.96	7.96	-0.0916667	1.13714	357.5	4.24	7.24	0.00322581	1.03429
250.3	4.74	7.74	0.232	1.10571	354.4	4.23	7.23	-0.0552632	1.03286
252.8	5.32	8.32	-0.0970588	1.18857	350.6	4.44	7.44	0.00645161	1.06286
256.2	4.99	7.99	-0.146667	1.14143	347.5	4.42	7.42	-0.0411765	1.06
259.2	4.55	7.55	0.209091	1.07857	344.1	4.56	7.56	0.12069	1.08
262.5	5.24	8.24	-0.144118	1.17714	341.2	4.21	7.21	-0.0967742	1.03
265.9	4.75	7.75	0.124242	1.10714	338.1	4.51	7.51	-0.102941	1.07286
269.2	5.16	8.16	0.0612903	1.16571	334.7	4.86	7.86	0.0891892	1.12286
272.3	5.35	8.35	-0.113333	1.19286	331	4.53	7.53	-0.0205882	1.07571
275.3	5.01	8.01	0.0678571	1.14429	327.6	4.6	7.6	0.152941	1.08571
278.1	5.2	8.2	-0.176	1.17143	324.2	4.08	7.08	0.00540541	1.01143
280.6	4.76	7.76	0.0464286	1.10857	320.5	4.06	7.06	-0.118919	1.00857
283.4	4.89	7.89	0.0607143	1.12714	316.8	4.5	7.5	0.163636	1.07143
286.2	5.06	8.06	0.132143	1.15143	313.5	3.96	6.96	-0.0516129	0.994286
289	5.43	8.43	-0.3	1.20429	310.4	4.12	7.12	-0.135294	1.01714
291.8	4.59	7.59	0.332	1.08429	307	4.58	7.58	0.016129	1.08286
294.3	5.42	8.42	-0.214286	1.20286	303.9	4.53	7.53	-0.0176471	1.07571
297.1	4.82	7.82	-0.0580645	1.11714	300.5	4.59	7.59	-0.0354839	1.08429
300.2	4.64	7.64	0.3	1.09143	297.4	4.7	7.7	0.327273	1.1
303.3	5.57	8.57	-0.267742	1.22429	294.1	3.62	6.62	-0.226471	0.945714
306.4	4.74	7.74	0.0774194	1.10571	290.7	4.39	7.39	-0.0142857	1.05571
309.5	4.98	7.98	-0.0764706	1.14	287.9	4.43	7.43	0.0714286	1.06143
312.9	4.72	7.72	-0.0235294	1.10286	285.1	4.23	7.23	0.128571	1.03286
316.3	4.64	7.64	-0.180645	1.09143	282.3	3.87	6.87	-0.189286	0.981429
319.4	4.08	7.08	0.212903	1.01143	279.5	4.4	7.4	0.106452	1.05714
322.5	4.74	7.74	0.0027027	1.10571	276.4	4.07	7.07	0.1	1.01
326.2	4.75	7.75	-0.209677	1.10714	273.7	3.8	6.8	-0.170968	0.971429
329.3	4.1	7.1	0.103226	1.01429	270.6	4.33	7.33	-0.0212121	1.04714
332.4	4.42	7.42	0.414706	1.06	267.3	4.4	7.4	-0.0535714	1.05714
335.8	5.83	8.83	-0.25	1.26143	264.5	4.55	7.55	0.0774194	1.07857
339.2	4.98	7.98	0.0457143	1.14	261.4	4.31	7.31	-0.03	1.04429
342.7	5.14	8.14	-0.132258	1.16286	258.4	4.4	7.4	0.212903	1.05714
345.8	4.73	7.73	-0.151724	1.10429	255.3	3.74	6.74	-0.0814815	0.962857
348.7	4.29	7.29	0.155882	1.04143	252.6	3.96	6.96	0.0451613	0.994286
352.1	4.82	7.82	0.0928571	1.11714	249.5	3.82	6.82	-0.226667	0.974286
354.9	5.08	8.08	0.053125	1.15429	246.5	4.5	7.5	0.0580645	1.07143
358.1	5.25	8.25	-0.0677419	1.17857	243.4	4.32	7.32	0.188889	1.04571
361.2	5.04	8.04	-0.0628571	1.14857	240.7	3.81	6.81	-0.412	0.972857
364.7	4.82	7.82	0.248387	1.11714	238.2	4.84	7.84	0.362963	1.12
367.8	5.59	8.59	-0.06875	1.22714	235.5	3.86	6.86	-0.25	0.98
371	5.37	8.37	-0.22069	1.19571	232.7	4.56	7.56	0.0962963	1.08
373.9	4.73	7.73	0.267742	1.10429	230	4.3	7.3	0.0709677	1.04286
377	5.56	8.56	-0.0375	1.22286	226.9	4.08	7.08	0.0151515	1.01143
380.2	5.44	8.44	0.0114286	1.20571	223.6	4.03	7.03	-0.166667	1.00429
383.7	5.48	8.48	-0.182353	1.21143	220.9	4.48	7.48	0.26	1.06857
387.1	4.86	7.86	-0.0605263	1.12286	217.9	3.7	6.7	-0.0222222	0.957143
390.9	4.63	7.63	0.0921053	1.09	215.2	3.76	6.76	-0.0571429	0.965714
394.7	4.98	7.98	0.0628571	1.14	212.4	3.92	6.92	0.0777778	0.988571
398.2	5.2	8.2	-0.0558824	1.17143	209.7	3.71	6.71	-0.148148	0.958571
401.6	5.01	8.01	-0.0428571	1.14429	207	4.11	7.11	0.075	1.01571
405.1	4.86	7.86	-0.0263158	1.12286	204.2	3.9	6.9	-0.062963	0.985714
408.9	4.76	7.76	0.009375	1.10857	201.5	4.07	7.07	0.0111111	1.01
412.1	4.79	7.79	-0.0552632	1.11286	198.8	4.04	7.04	0.037037	1.00571
415.9	4.58	7.58	0.14375	1.08286	196.1	3.94	6.94	-0.2	0.991429
419.1	5.04	8.04	0.15625	1.14857	193.4	4.48	7.48	-0.11	1.06857
422.3	5.54	8.54	0.0314286	1.22	190.4	4.81	7.81	0.223333	1.11571
425.8	5.65	8.65	-0.0861111	1.23571	187.4	4.14	7.14	-0.1	1.02
429.4	5.34	8.34	-0.11875	1.19143	184.4	4.44	7.44	0	1.06286
432.6	4.96	7.96	0.21875	1.13714	181.7	4.44	7.44	0.244444	1.06286
435.8	5.66	8.66	-0.424242	1.23714	179	3.78	6.78	0.0962963	0.968571
439.1	4.26	7.26	-0.0657895	1.03714	176.3	3.52	6.52	-0.411111	0.931429
442.9	4.01	7.01	0.4	1.00143	173.6	4.63	7.63	0.2	1.09
446.1	5.29	8.29	0.0787879	1.18429	170.9	4.09	7.09	0.106897	1.01286
449.4	5.55	8.55	-0.34375	1.22143	168	3.78	6.78	0.0037037	0.968571
452.6	4.45	7.45	0.123333	1.06429	165.3	3.77	6.77	0.0185185	0.967143
455.6	4.82	7.82	0.06	1.11714	162.6	3.72	6.72	-0.17037	0.96
459.1	5.03	8.03	-0.105556	1.14714	159.9	4.18	7.18	0.337037	1.02571
462.7	4.65	7.65	0.14359	1.09286	157.2	3.27	6.27	-0.303704	0.895714
466.6	5.21	8.21	-0.0315789	1.17286	154.5	4.09	7.09	-0.0888889	1.01286
470.4	5.09	8.09	0.161905	1.15571	151.8	4.33	7.33	0.104167	1.04714
474.6	5.77	8.77	-0.207692	1.25286	149.4	4.08	7.08	-0.0666667	1.01143
478.5	4.96	7.96	0.075	1.13714	146.7	4.26	7.26	-0.0482759	1.03714
481.7	5.2	8.2	0.0722222	1.17143	143.8	4.4	7.4	-0.0333333	1.05714
485.3	5.46	8.46	-0.172727	1.20857	141.1	4.49	7.49	0.292308	1.07
488.6	4.89	7.89	0.127273	1.12714	138.5	3.73	6.73	-0.13	0.961429
491.9	5.31	8.31	0.0583333	1.18714	135.5	4.12	7.12	0.0344828	1.01714
495.5	5.52	8.52	-0.225	1.21714	132.6	4.02	7.02	0.0344828	1.00286
499.1	4.71	7.71	-0.0972222	1.10143	129.7	3.92	6.92	0.0111111	0.988571
502.7	4.36	7.36	0.181818	1.05143	127	3.89	6.89	-0.0172414	0.984286
506	4.96	7.96	0.0878788	1.13714	124.1	3.94	6.94	-0.0814815	0.991429
509.3	5.25	8.25	0.1	1.17857	121.4	4.16	7.16	0.138462	1.02286
512.7	5.59	8.59	-0.0333333	1.22714	118.8	3.8	6.8	0	0.971429
516.6	5.46	8.46	-0.125	1.20857	116.4	3.8	6.8	-0.05	0.971429
520.2	5.01	8.01	-0.0567568	1.14429	114	3.92	6.92	0.0423077	0.988571
523.9	4.8	7.8	-0.00714286	1.11429	111.4	3.81	6.81	-0.233333	0.972857
528.1	4.77	7.77	-0.0538462	1.11	109	4.37	7.37	0.191667	1.05286
532	4.56	7.56	0.0756757	1.08	106.6	3.91	6.91	-0.0619048	0.987143
535.7	4.84	7.84	-0.130233	1.12	104.5	4.04	7.04	-0.00833333	1.00571
540	4.28	7.28	0.172222	1.04	102.1	4.06	7.06	0.0047619	1.00857
543.6	4.9	7.9	0.125	1.12857	100	4.05	7.05	0.052381	1.00714
547.6	5.4	8.4	0.02	1.2	97.9	3.94	6.94	0.142857	0.991429
551.6	5.48	8.48	-0.147222	1.21143	95.8	3.64	6.64	0.025	0.948571
555.2	4.95	7.95	0.0972973	1.13571	93.4	3.58	6.58	-0.209524	0.94
558.9	5.31	8.31	-0.0918919	1.18714	91.3	4.02	7.02	0.0047619	1.00286
562.6	4.97	7.97	-0.305405	1.13857	89.2	4.01	7.01	0.0142857	1.00143
566.3	3.84	6.84	-0.04	0.977143	87.1	3.98	6.98	0.0708333	0.997143
570.3	3.68	6.68	0.1	0.954286	84.7	3.81	6.81	0.0380952	0.972857
574	4.05	7.05	-0.259459	1.00714	82.6	3.73	6.73	0.0666667	0.961429
577.7	3.09	6.09	-0.00588235	0.87	80.5	3.59	6.59	-0.27619	0.941429
581.1	3.07	6.07	-0.767647	0.867143	78.4	4.17	7.17	0.0444444	1.02429
584.5	0.46	3.46	-0.332143	0.494286	76.6	4.09	7.09	-0.0190476	1.01286
587.3	-0.47	2.53	-0.453571	0.361429	74.5	4.13	7.13	0.12381	1.01857
590.1	-1.74	1.26	0.0676471	0.18	72.4	3.87	6.87	-0.138095	0.981429
593.5	-1.51	1.49	0.167742	0.212857	70.3	4.16	7.16	-0.0722222	1.02286
596.6	-0.99	2.01	-0.137838	0.287143	68.5	4.29	7.29	0.128571	1.04143
600.3	-1.5	1.5	0.1	0.214286	66.4	4.02	7.02	0.0222222	1.00286
603.4	-1.19	1.81	-0.036	0.258571	64.6	3.98	6.98	-0.0166667	0.997143
605.9	-1.28	1.72	-0.336842	0.245714	62.8	4.01	7.01	0.03125	1.00143
607.8	-1.92	1.08	-0.03	0.154286	61.2	3.96	6.96	0.0714286	0.994286
608.8	-1.95	1.05	-0.00320302	0.15	59.1	3.81	6.81	-0.116667	0.972857
					57.3	4.02	7.02	0.0384615	1.00286
					54.7	3.92	6.92	0.0137931	0.988571
					51.8	3.88	6.88	-0.0785714	0.982857
					49	4.1	7.1	0.0206897	1.01429
					46.1	4.04	7.04	0.0461538	1.00571
					43.5	3.92	6.92	0	0.988571
					41.2	3.92	6.92	0	0.988571
					39.1	3.92	6.92	0.100256	0.988571

## Sheet: 804
				Heating HT					Cooling HT
TEMP	CSUSC		1st deriv	knormed				1st deriv	knormed			Mr	Ms	Hcr	Hc	Mrs/Ms	Bcr/Bc	ΔMr/Ms	ΔBcr/Bc
27.2	-0.5	2.5	-1.03333	1	610.3	-1.52	1.48	0.4	0.592		BEFORE	0.223521	2.398	321.271	96.568	0.093	3.32689	0.014	0.21634
27.5	-0.81	2.19	-0.0333333	0.876	609.7	-1.76	1.24	0.0263158	0.496		AFTER	0.028905	0.270995	535.722	151.196	0.107	3.54323
29.3	-0.87	2.13	0.0142857	0.852	607.8	-1.81	1.19	-0.08	0.476
32.1	-0.83	2.17	0.0588235	0.868	606.3	-1.69	1.31	-0.116	0.524
35.5	-0.63	2.37	0.0222222	0.948	603.8	-1.4	1.6	0.336364	0.64
39.1	-0.55	2.45	-0.113889	0.98	601.6	-2.14	0.86	-0.15	0.344
42.7	-0.96	2.04	0.0972973	0.816	598.8	-1.72	1.28	0.339286	0.512
46.4	-0.6	2.4	0.00555556	0.96	596	-2.67	0.33	-0.1	0.132
50	-0.58	2.42	-0.0205882	0.968	592.9	-2.36	0.64	-0.155882	0.256
53.4	-0.65	2.35	0.0709677	0.94	589.5	-1.83	1.17	-0.135714	0.468
56.5	-0.43	2.57	-0.0354839	1.028	586.7	-1.45	1.55	0.25	0.62
59.6	-0.54	2.46	-0.0346154	0.984	583.3	-2.3	0.7	-0.176471	0.28
62.2	-0.63	2.37	-0.0517241	0.948	579.9	-1.7	1.3	-0.00645161	0.52
65.1	-0.78	2.22	0.0416667	0.888	576.8	-1.68	1.32	0.121429	0.528
67.5	-0.68	2.32	-0.0153846	0.928	574	-2.02	0.98	-0.16129	0.392
70.1	-0.72	2.28	0.0782609	0.912	570.9	-1.52	1.48	-0.00967742	0.592
72.4	-0.54	2.46	-0.175	0.984	567.8	-1.49	1.51	-0.0764706	0.604
74.8	-0.96	2.04	0.0923077	0.816	564.4	-1.23	1.77	0.115152	0.708
77.4	-0.72	2.28	-0.0416667	0.912	561.1	-1.61	1.39	-0.0676471	0.556
79.8	-0.82	2.18	-0.156522	0.872	557.7	-1.38	1.62	-0.0588235	0.648		Tc1	Tc2
82.1	-1.18	1.82	0.125	0.728	554.3	-1.18	1.82	0.0727273	0.728		552.5	538.4
84.5	-0.88	2.12	0.121739	0.848	551	-1.42	1.58	-0.0548387	0.632		HPR 1	HPR 2	A40[%]
86.8	-0.6	2.4	-0.154167	0.96	547.9	-1.25	1.75	-0.132143	0.7		-	-	-14.554
89.2	-0.97	2.03	0.0791667	0.812	545.1	-0.88	2.12	0.0575758	0.848		Kmax h	Kmax c
91.6	-0.78	2.22	0.0521739	0.888	541.8	-1.07	1.93	0.126471	0.772
93.9	-0.66	2.34	-0.0333333	0.936	538.4	-1.5	1.5	-0.227273	0.6
96	-0.73	2.27	-0.116667	0.908	535.1	-0.75	2.25	0	0.9
98.4	-1.01	1.99	0.2	0.796	531.4	-0.75	2.25	-0.0212121	0.9
100.5	-0.59	2.41	-0.0291667	0.964	528.1	-0.68	2.32	0.186667	0.928
102.9	-0.66	2.34	-0.0291667	0.936	525.1	-1.24	1.76	-0.170588	0.704
105.3	-0.73	2.27	0	0.908	521.7	-0.66	2.34	0.186667	0.936
107.9	-0.73	2.27	0.148148	0.908	518.7	-1.22	1.78	-0.143333	0.712
110.6	-0.33	2.67	-0.146154	1.068	515.7	-0.79	2.21	0.0545455	0.884
113.2	-0.71	2.29	0.0592593	0.916	512.4	-0.97	2.03	-0.0941176	0.812
115.9	-0.55	2.45	-0.119231	0.98	509	-0.65	2.35	0.0694444	0.94
118.5	-0.86	2.14	0.0551724	0.856	505.4	-0.9	2.1	-0.0030303	0.84
121.4	-0.7	2.3	0.0222222	0.92	502.1	-0.89	2.11	-0.0363636	0.844
124.1	-0.64	2.36	-0.0517241	0.944	498.8	-0.77	2.23	0.0861111	0.892
127	-0.79	2.21	0.0222222	0.884	495.2	-1.08	1.92	-0.139394	0.768
129.7	-0.73	2.27	-0.0103448	0.908	491.9	-0.62	2.38	-0.00833333	0.952
132.6	-0.76	2.24	-0.0740741	0.896	488.3	-0.59	2.41	-0.0545455	0.964
135.3	-0.96	2.04	0.0961538	0.816	485	-0.41	2.59	0.205556	1.036
137.9	-0.71	2.29	0.0407407	0.916	481.4	-1.15	1.85	0.0875	0.74
140.6	-0.6	2.4	-0.0259259	0.96	478.2	-1.43	1.57	-0.0487179	0.628
143.3	-0.67	2.33	0.0192308	0.932	474.3	-1.24	1.76	-0.145455	0.704
145.9	-0.62	2.38	-0.0444444	0.952	471	-0.76	2.24	0.130556	0.896
148.6	-0.74	2.26	-0.0733333	0.904	467.4	-1.23	1.77	-0.237931	0.708
151.6	-0.96	2.04	0.0769231	0.816	464.5	-0.54	2.46	0.0777778	0.984
154.2	-0.76	2.24	0.12	0.896	460.9	-0.82	2.18	-0.0542857	0.872
157.2	-0.4	2.6	0.0740741	1.04	457.4	-0.63	2.37	0.1	0.948
159.9	-0.2	2.8	-0.255556	1.12	453.5	-1.02	1.98	-0.128571	0.792
162.6	-0.89	2.11	-0.037037	0.844	450	-0.57	2.43	0.0142857	0.972
165.3	-0.99	2.01	0.00344828	0.804	445.8	-0.63	2.37	0.126316	0.948
168.2	-0.98	2.02	0.0566667	0.808	442	-1.11	1.89	-0.121053	0.756
171.2	-0.81	2.19	-0.107407	0.876	438.2	-0.65	2.35	0.00263158	0.94
173.9	-1.1	1.9	0.0466667	0.76	434.4	-0.66	2.34	0.133333	0.936
176.9	-0.96	2.04	-0.0413793	0.816	430.8	-1.14	1.86	-0.04375	0.744
179.8	-1.08	1.92	0.0766667	0.768	427.6	-1	2	0.0257143	0.8
182.8	-0.85	2.15	0.0833333	0.86	424.1	-1.09	1.91	-0.08	0.764
185.8	-0.6	2.4	-0.0740741	0.96	420.6	-0.81	2.19	0.0815789	0.876
188.5	-0.8	2.2	0.05	0.88	416.8	-1.12	1.88	-0.0257143	0.752
191.5	-0.65	2.35	0.0133333	0.94	413.3	-1.03	1.97	-0.0710526	0.788
194.5	-0.61	2.39	0.0407407	0.956	409.5	-0.76	2.24	0.0742857	0.896
197.2	-0.5	2.5	-0.0703704	1	406	-1.02	1.98	-0.08	0.792
199.9	-0.69	2.31	0.0533333	0.924	402.5	-0.74	2.26	-0.103125	0.904
202.9	-0.53	2.47	-0.233333	0.988	399.3	-0.41	2.59	-0.071875	1.036
205.6	-1.16	1.84	0.0296296	0.736	396.1	-0.18	2.82	0.0228571	1.128
208.3	-1.08	1.92	0.0866667	0.768	392.6	-0.26	2.74	0.123529	1.096
211.3	-0.82	2.18	0.0454545	0.872	389.2	-0.68	2.32	-0.00285714	0.928
214.6	-0.67	2.33	0.03	0.932	385.7	-0.67	2.33	-0.0628571	0.932
217.6	-0.58	2.42	-0.143333	0.968	382.2	-0.45	2.55	0.0764706	1.02
220.6	-1.01	1.99	0.0714286	0.796	378.8	-0.71	2.29	-0.00285714	0.916
223.4	-0.81	2.19	-0.0888889	0.876	375.3	-0.7	2.3	0.0702703	0.92
226.1	-1.05	1.95	-0.114286	0.78	371.6	-0.96	2.04	-0.0171429	0.816
228.9	-1.37	1.63	0.2	0.652	368.1	-0.9	2.1	0.0411765	0.84
231.6	-0.83	2.17	-0.178571	0.868	364.7	-1.04	1.96	-0.1	0.784
234.4	-1.33	1.67	0.13	0.668	361.2	-0.69	2.31	-0.0351351	0.924
237.4	-0.94	2.06	0.107407	0.824	357.5	-0.56	2.44	0.2	0.976
240.1	-0.65	2.35	-0.189286	0.94	354.1	-1.24	1.76	0.0375	0.704
242.9	-1.18	1.82	0.276667	0.728	350.9	-1.36	1.64	-0.0529412	0.656
245.9	-0.35	2.65	-0.210714	1.06	347.5	-1.18	1.82	-0.0870968	0.728
248.7	-0.94	2.06	0.025	0.824	344.4	-0.91	2.09	0.05625	0.836
251.5	-0.87	2.13	-0.0636364	0.852	341.2	-1.09	1.91	-0.0642857	0.764
254.8	-1.08	1.92	0.216667	0.768	338.4	-0.91	2.09	0.0677419	0.836
257.8	-0.43	2.57	-0.0939394	1.028	335.3	-1.12	1.88	0.0689655	0.752
261.1	-0.74	2.26	-0.125806	0.904	332.4	-1.32	1.68	-0.0516129	0.672
264.2	-1.13	1.87	0.112903	0.748	329.3	-1.16	1.84	-0.0264706	0.736
267.3	-0.78	2.22	0.030303	0.888	325.9	-1.07	1.93	-0.0741935	0.772
270.6	-0.68	2.32	-0.0178571	0.928	322.8	-0.84	2.16	-0.0387097	0.864
273.4	-0.73	2.27	0.0466667	0.908	319.7	-0.72	2.28	0.129412	0.912
276.4	-0.59	2.41	-0.116129	0.964	316.3	-1.16	1.84	0.0642857	0.736
279.5	-0.95	2.05	-0.0612903	0.82	313.5	-1.34	1.66	-0.083871	0.664
282.6	-1.14	1.86	0	0.744	310.4	-1.08	1.92	-0.177419	0.768
285.7	-1.14	1.86	0.0866667	0.744	307.3	-0.53	2.47	0.248276	0.988
288.7	-0.88	2.12	-0.0419355	0.848	304.4	-1.25	1.75	0.11	0.7
291.8	-1.01	1.99	0.189286	0.796	301.4	-1.58	1.42	-0.161765	0.568
294.6	-0.48	2.52	-0.0935484	1.008	298	-1.03	1.97	0.0774194	0.788
297.7	-0.77	2.23	0.00588235	0.892	294.9	-1.27	1.73	-0.0235294	0.692
301.1	-0.75	2.25	0.0484848	0.9	291.5	-1.19	1.81	-0.07	0.724
304.4	-0.59	2.41	-0.123529	0.964	288.5	-0.98	2.02	0.0852941	0.808
307.8	-1.01	1.99	0.0354839	0.796	285.1	-1.27	1.73	0.0516129	0.692
310.9	-0.9	2.1	0.0322581	0.84	282	-1.43	1.57	-0.0757576	0.628
314	-0.8	2.2	0.0529412	0.88	278.7	-1.18	1.82	-0.0387097	0.728
317.4	-0.62	2.38	-0.0193548	0.952	275.6	-1.06	1.94	0.109677	0.776
320.5	-0.68	2.32	0.0558824	0.928	272.5	-1.4	1.6	-0.133333	0.64
323.9	-0.49	2.51	-0.219355	1.004	269.2	-0.96	2.04	0.0969697	0.816
327	-1.17	1.83	0.05625	0.732	265.9	-1.28	1.72	-0.0516129	0.688
330.2	-0.99	2.01	0.0225806	0.804	262.8	-1.12	1.88	-0.160714	0.752
333.3	-0.92	2.08	0.0870968	0.832	260	-0.67	2.33	0.0481481	0.932
336.4	-0.65	2.35	-0.122581	0.94	257.3	-0.8	2.2	0.0903226	0.88
339.5	-1.03	1.97	-0.009375	0.788	254.2	-1.08	1.92	-0.0037037	0.768
342.7	-1.06	1.94	-0.00322581	0.776	251.5	-1.07	1.93	0.15	0.772
345.8	-1.07	1.93	0.0193548	0.772	248.7	-1.49	1.51	0.00714286	0.604
348.9	-1.01	1.99	-0.02	0.796	245.9	-1.51	1.49	-0.052	0.596
352.4	-1.08	1.92	0.0882353	0.768	243.4	-1.38	1.62	-0.0703704	0.648
355.8	-0.78	2.22	0.0354839	0.888	240.7	-1.19	1.81	-0.05	0.724
358.9	-0.67	2.33	0.0685714	0.932	237.9	-1.05	1.95	-0.0740741	0.78
362.4	-0.43	2.57	-0.106452	1.028	235.2	-0.85	2.15	0.178571	0.86
365.5	-0.76	2.24	0.0228571	0.896	232.4	-1.35	1.65	-0.125926	0.66
369	-0.68	2.32	-0.0206897	0.928	229.7	-1.01	1.99	0.136667	0.796
371.9	-0.74	2.26	0.147059	0.904	226.7	-1.42	1.58	0.024	0.632
375.3	-0.24	2.76	-0.131034	1.104	224.2	-1.48	1.52	-0.0518519	0.608
378.2	-0.62	2.38	0.03125	0.952	221.5	-1.34	1.66	0.0193548	0.664
381.4	-0.52	2.48	0.0322581	0.992	218.4	-1.4	1.6	-0.0444444	0.64
384.5	-0.42	2.58	0.0157895	1.032	215.7	-1.28	1.72	-0.0703704	0.688
388.3	-0.36	2.64	-0.257143	1.056	213	-1.09	1.91	0.0633333	0.764
391.8	-1.26	1.74	0.0675676	0.696	210	-1.28	1.72	0.107143	0.688
395.5	-1.01	1.99	0	0.796	207.2	-1.58	1.42	0.0333333	0.568
399.3	-1.01	1.99	0.0771429	0.796	204.5	-1.67	1.33	-0.146667	0.532
402.8	-0.74	2.26	0.02	0.904	201.5	-1.23	1.77	0.0481481	0.708
406.3	-0.67	2.33	-0.231429	0.932	198.8	-1.36	1.64	-0.07	0.656
409.8	-1.48	1.52	0.15625	0.608	195.8	-1.15	1.85	-0.04375	0.74
413	-0.98	2.02	-0.0314286	0.808	192.6	-1.01	1.99	0.0464286	0.796
416.5	-1.09	1.91	0.0142857	0.764	189.8	-1.14	1.86	-0.103704	0.744
420	-1.04	1.96	0.0447368	0.784	187.1	-0.86	2.14	0.0740741	0.856
423.8	-0.87	2.13	0.131429	0.852	184.4	-1.06	1.94	-0.111111	0.776
427.3	-0.41	2.59	0.0172414	1.036	181.7	-0.76	2.24	0.17037	0.896
430.2	-0.36	2.64	-0.148485	1.056	179	-1.22	1.78	-0.0518519	0.712
433.5	-0.85	2.15	0.0375	0.86	176.3	-1.08	1.92	0.107407	0.768
436.7	-0.73	2.27	0.0285714	0.908	173.6	-1.37	1.63	-0.22	0.652
440.2	-0.63	2.37	-0.108333	0.948	170.6	-0.71	2.29	0.0807692	0.916
443.8	-1.02	1.98	0.0371429	0.792	168	-0.92	2.08	0.0777778	0.832
447.3	-0.89	2.11	-0.142105	0.844	165.3	-1.13	1.87	0.12963	0.748
451.1	-1.43	1.57	0.1	0.628	162.6	-1.48	1.52	-0.207407	0.608
454.7	-1.07	1.93	0.2	0.772	159.9	-0.92	2.08	0.114815	0.832
458.2	-0.37	2.63	-0.223077	1.052	157.2	-1.23	1.77	-0.0814815	0.708
462.1	-1.24	1.76	0.161111	0.704	154.5	-1.01	1.99	0.0222222	0.796
465.7	-0.66	2.34	0.0105263	0.936	151.8	-1.07	1.93	-0.142308	0.772
469.5	-0.62	2.38	0.0666667	0.952	149.2	-0.7	2.3	0.162963	0.92
473.1	-0.38	2.62	-0.0974359	1.048	146.5	-1.14	1.86	-0.12	0.744
477	-0.76	2.24	0.0342857	0.896	143.5	-0.78	2.22	0.0923077	0.888
480.5	-0.64	2.36	0.141667	0.944	140.9	-1.02	1.98	0.0592593	0.792
484.1	-0.13	2.87	-0.225	1.148	138.2	-1.18	1.82	0	0.728
487.7	-0.94	2.06	-0.0694444	0.824	135.5	-1.18	1.82	-0.0689655	0.728
491.3	-1.19	1.81	0.0757576	0.724	132.6	-0.98	2.02	0.275	0.808
494.6	-0.94	2.06	0.0666667	0.824	130.2	-1.64	1.36	-0.00740741	0.544
497.9	-0.72	2.28	-0.0638889	0.912	127.5	-1.62	1.38	-0.05	0.552
501.5	-0.95	2.05	0.0435897	0.82	124.9	-1.49	1.51	-0.129167	0.604
505.4	-0.78	2.22	0.0583333	0.888	122.5	-1.18	1.82	0.104167	0.728
509	-0.57	2.43	0.0432432	0.972	120.1	-1.43	1.57	-0.104167	0.628
512.7	-0.41	2.59	0.0515152	1.036	117.7	-1.18	1.82	0.00833333	0.728
516	-0.24	2.76	-0.175	1.104	115.3	-1.2	1.8	-0.0958333	0.72
519.6	-0.87	2.13	0.0230769	0.852	112.9	-0.97	2.03	-0.130769	0.812
523.5	-0.78	2.22	-0.0864865	0.888	110.3	-0.63	2.37	0.133333	0.948
527.2	-1.1	1.9	-0.0444444	0.76	108.2	-0.91	2.09	0.133333	0.836
530.8	-1.26	1.74	0.148649	0.696	105.8	-1.23	1.77	-0.0708333	0.708
534.5	-0.71	2.29	-0.0583333	0.916	103.4	-1.06	1.94	0.0230769	0.776
538.1	-0.92	2.08	0.0675676	0.832	100.8	-1.12	1.88	0.0833333	0.752
541.8	-0.67	2.33	0.0694444	0.932	98.4	-1.32	1.68	-0.0291667	0.672
545.4	-0.42	2.58	-0.0911765	1.032	96	-1.25	1.75	-0.0130435	0.7
548.8	-0.73	2.27	0.17027	0.908	93.7	-1.22	1.78	0.0714286	0.712
552.5	-0.1	2.9	-0.230303	1.16	91.6	-1.37	1.63	-0.0333333	0.652
555.8	-0.86	2.14	-0.0621622	0.856	89.5	-1.3	1.7	-0.0380952	0.68
559.5	-1.09	1.91	0.0375	0.764	87.4	-1.22	1.78	0.0809524	0.712
563.5	-0.94	2.06	0.0025	0.824	85.3	-1.39	1.61	-0.104762	0.644
567.5	-0.93	2.07	0.00810811	0.828	83.2	-1.17	1.83	0.157143	0.732
571.2	-0.9	2.1	-0.0525	0.84	81.1	-1.5	1.5	-0.0380952	0.6
575.2	-1.11	1.89	0.0705882	0.756	79	-1.42	1.58	-0.1	0.632
578.6	-0.87	2.13	-0.035	0.852	77.1	-1.23	1.77	0.0166667	0.708
582.6	-1.01	1.99	0.00526316	0.796	75.3	-1.26	1.74	-0.0571429	0.696
586.4	-0.99	2.01	0.0441176	0.804	73.2	-1.14	1.86	0.0555556	0.744
589.8	-0.84	2.16	-0.0459459	0.864	71.4	-1.24	1.76	0.0444444	0.704
593.5	-1.01	1.99	-0.0756757	0.796	69.6	-1.32	1.68	-0.115789	0.672
597.2	-1.29	1.71	-0.223684	0.684	67.7	-1.1	1.9	0.222222	0.76
601	-2.14	0.86	0.354054	0.344	65.9	-1.5	1.5	-0.0444444	0.6
604.7	-0.83	2.17	-0.175	0.868	64.1	-1.42	1.58	-0.14375	0.632
607.5	-1.32	1.68	0.0636364	0.672	62.5	-1.19	1.81	-0.0333333	0.724
609.7	-1.18	1.82	0	0.728	60.7	-1.13	1.87	-0.025	0.748
610.6	-1.18	1.82	-1.3	0.728	59.1	-1.09	1.91	-0.0047619	0.764
610.9	-1.57	1.43	-0.00256998	0.572	57	-1.08	1.92	0	0.768
					54.7	-1.08	1.92	0.0884615	0.768
					52.1	-1.31	1.69	-0.00384615	0.676
					49.5	-1.3	1.7	-0.0115385	0.68
					46.9	-1.27	1.73	0.00434783	0.692
					44.6	-1.28	1.72	0	0.688
					42.5	-1.28	1.72	-0.047619	0.688
					40.4	-1.18	1.82	0.133333	0.728
					38.9	-1.38	1.62	-0.0354756	0.648

## Sheet: 995G
				Heating HT					Cooling HT
TEMP	CSUSC		1st deriv	knormed				1st deriv	knormed			Mr	Ms	Hcr	Hc	Mrs/Ms	Bcr/Bc	ΔMr/Ms	ΔBcr/Bc
29	13.54	16.54	0.133333	1	607.2	-1.64	1.36	-0.484615	0.0822249		BEFORE	5.408	25.86	363.959	185.704	0.209	1.95989	0.033	-0.021936
29.6	13.62	16.62	-0.025	1.00484	605.9	-1.01	1.99	0.42381	0.120314		AFTER	6.25	25.803	439.698	226.888	0.242	1.93795
31.6	13.57	16.57	0.0264706	1.00181	603.8	-1.9	1.1	0.1	0.0665054
35	13.66	16.66	-0.00967742	1.00726	601.9	-2.09	0.91	-0.263158	0.0550181
38.1	13.63	16.63	0.0676471	1.00544	600	-1.59	1.41	0.186364	0.0852479
41.5	13.86	16.86	0.0194444	1.01935	597.8	-2	1	-0.0458333	0.0604595
45.1	13.93	16.93	0.0852941	1.02358	595.4	-1.89	1.11	-0.360714	0.06711
48.5	14.22	17.22	0.0575758	1.04111	592.6	-0.88	2.12	-0.177419	0.128174
51.8	14.41	17.41	0.0205882	1.0526	589.5	-0.33	2.67	-1.29032	0.161427
55.2	14.48	17.48	0.0419355	1.05683	586.4	3.67	6.67	-1.89143	0.403265
58.3	14.61	17.61	-0.00344828	1.06469	582.9	10.29	13.29	-2.26471	0.803507
61.2	14.6	17.6	0.037931	1.06409	579.5	17.99	20.99	-0.920588	1.26904
64.1	14.71	17.71	-0.126923	1.07074	576.1	21.12	24.12	-0.581481	1.45828
66.7	14.38	17.38	0.0538462	1.05079	573.4	22.69	25.69	0	1.5532
69.3	14.52	17.52	0.0115385	1.05925	570	22.69	25.69	0.0882353	1.5532
71.9	14.55	17.55	0.0730769	1.06106	566.6	22.39	25.39	-0.164516	1.53507
74.5	14.74	17.74	-0.0291667	1.07255	563.5	22.9	25.9	0.0777778	1.5659
76.9	14.67	17.67	0.0347826	1.06832	560.8	22.69	25.69	0.167647	1.5532
79.2	14.75	17.75	-0.17037	1.07316	557.4	22.12	25.12	-0.0967742	1.51874
81.9	14.29	17.29	0.180952	1.04534	554.3	22.42	25.42	-0.166667	1.53688		Tc1	Tc2
84	14.67	17.67	0.213043	1.06832	551.3	22.92	25.92	0.197059	1.56711		580.5	582.9
86.3	15.16	18.16	-0.170833	1.09794	547.9	22.25	25.25	-0.0823529	1.5266		HPR 1	HPR 2	A40[%]
88.7	14.75	17.75	0.356522	1.07316	544.5	22.53	25.53	-0.0366667	1.54353		1.57376	1.3144	19.2866
91	15.57	18.57	-0.1	1.12273	541.5	22.64	25.64	0.0411765	1.55018		Kmax h	Kmax c
93.4	15.33	18.33	-0.0761905	1.10822	538.1	22.5	25.5	-0.0888889	1.54172		26.03	25.92
95.5	15.17	18.17	0.0166667	1.09855	534.5	22.82	25.82	0.124324	1.56106
97.9	15.21	18.21	0.0416667	1.10097	530.8	22.36	25.36	-0.0944444	1.53325
100.3	15.31	18.31	0.126923	1.10701	527.2	22.7	25.7	0.2	1.55381
102.9	15.64	18.64	0.0541667	1.12696	523.5	21.96	24.96	-0.0888889	1.50907
105.3	15.77	18.77	0	1.13482	519.9	22.28	25.28	-0.0363636	1.52842
107.9	15.77	18.77	0.148148	1.13482	516.6	22.4	25.4	0.0222222	1.53567
110.6	16.17	19.17	-0.0307692	1.15901	513	22.32	25.32	0.141176	1.53083
113.2	16.09	19.09	0.0222222	1.15417	509.6	21.84	24.84	-0.0393939	1.50181
115.9	16.15	19.15	-0.0413793	1.1578	506.3	21.97	24.97	0.0151515	1.50967
118.8	16.03	19.03	0.142308	1.15054	503	21.92	24.92	0.154545	1.50665
121.4	16.4	19.4	-0.0148148	1.17291	499.7	21.41	24.41	-0.144444	1.47582
124.1	16.36	19.36	0.0896552	1.1705	496.1	21.93	24.93	0.0871795	1.50726
127	16.62	19.62	0.0555556	1.18622	492.2	21.59	24.59	0.0717949	1.4867
129.7	16.77	19.77	-0.0538462	1.19528	488.3	21.31	24.31	0.141667	1.46977
132.3	16.63	19.63	0.07	1.18682	484.7	20.8	23.8	0.0487179	1.43894
135.3	16.84	19.84	-0.0576923	1.19952	480.8	20.61	23.61	-0.0947368	1.42745
137.9	16.69	19.69	0.151852	1.19045	477	20.97	23.97	0.0305556	1.44921
140.6	17.1	20.1	0.0111111	1.21524	473.4	20.86	23.86	0.030303	1.44256
143.3	17.13	20.13	-0.0551724	1.21705	470.1	20.76	23.76	0.1875	1.43652
146.2	16.97	19.97	0.0740741	1.20738	466.9	20.16	23.16	-0.157576	1.40024
148.9	17.17	20.17	0.2	1.21947	463.6	20.68	23.68	-0.0282051	1.43168
151.8	17.75	20.75	-0.0777778	1.25453	459.7	20.79	23.79	-0.034375	1.43833
154.5	17.54	20.54	-0.0518519	1.24184	456.5	20.9	23.9	0.0871795	1.44498
157.2	17.4	20.4	0.111111	1.23337	452.6	20.56	23.56	0.00625	1.42443
159.9	17.7	20.7	-0.124138	1.25151	449.4	20.54	23.54	0.075	1.42322
162.8	17.34	20.34	0.173333	1.22975	445.8	20.27	23.27	-0.0914286	1.40689
165.8	17.86	20.86	0.0259259	1.26119	442.3	20.59	23.59	0.0657143	1.42624
168.5	17.93	20.93	-0.0866667	1.26542	438.8	20.36	23.36	0.145455	1.41233
171.5	17.67	20.67	-0.0259259	1.2497	435.5	19.88	22.88	-0.037931	1.38331
174.2	17.6	20.6	0.189655	1.24547	432.6	19.99	22.99	-0.0125	1.38996
177.1	18.15	21.15	-0.233333	1.27872	429.4	20.03	23.03	0.116667	1.39238
179.8	17.52	20.52	0.176667	1.24063	425.8	19.61	22.61	-0.0171429	1.36699
182.8	18.05	21.05	0.0166667	1.27267	422.3	19.67	22.67	-0.06	1.37062
185.8	18.1	21.1	0.037037	1.2757	418.8	19.88	22.88	-0.0171429	1.38331
188.5	18.2	21.2	0.122222	1.28174	415.3	19.94	22.94	0.154286	1.38694
191.2	18.53	21.53	-0.0433333	1.30169	411.8	19.4	22.4	0.05	1.35429
194.2	18.4	21.4	0	1.29383	408.6	19.24	22.24	-0.08125	1.34462
197.2	18.4	21.4	-0.0666667	1.29383	405.4	19.5	22.5	-0.0771429	1.36034
200.2	18.2	21.2	0.0259259	1.28174	401.9	19.77	22.77	0.034375	1.37666
202.9	18.27	21.27	0.1	1.28597	398.7	19.66	22.66	-0.11875	1.37001
205.6	18.54	21.54	-0.103333	1.3023	395.5	20.04	23.04	0	1.39299
208.6	18.23	21.23	0.0555556	1.28356	392.4	20.04	23.04	0.1625	1.39299
211.3	18.38	21.38	0.05	1.29262	389.2	19.52	22.52	0.059375	1.36155
214.1	18.52	21.52	-0.00333333	1.30109	386	19.33	22.33	-0.096875	1.35006
217.1	18.51	21.51	0.03	1.30048	382.8	19.64	22.64	0.11875	1.3688
220.1	18.6	21.6	0.0966667	1.30593	379.6	19.26	22.26	0.0176471	1.34583
223.1	18.89	21.89	0.02	1.32346	376.2	19.2	22.2	0.078125	1.3422
226.1	18.95	21.95	-0.106061	1.32709	373	18.95	21.95	0.03125	1.32709
229.4	18.6	21.6	0.152	1.30593	369.8	18.85	21.85	-0.05	1.32104
231.9	18.98	21.98	0	1.3289	366.4	19.02	22.02	-0.0135135	1.33132
234.6	18.98	21.98	-0.0785714	1.3289	362.7	19.07	22.07	0.122857	1.33434
237.4	18.76	21.76	0.181481	1.3156	359.2	18.64	21.64	0.0258065	1.30834
240.1	19.25	22.25	-0.0821429	1.34522	356.1	18.56	21.56	0.06	1.30351
242.9	19.02	22.02	0.084	1.33132	352.6	18.35	21.35	-0.0258065	1.29081
245.4	19.23	22.23	0.052	1.34401	349.5	18.43	21.43	-0.0941176	1.29565
247.9	19.36	22.36	0.0666667	1.35187	346.1	18.75	21.75	0.037931	1.31499
250.6	19.54	22.54	-0.0642857	1.36276	343.2	18.64	21.64	0.0294118	1.30834
253.4	19.36	22.36	0.0393939	1.35187	339.8	18.54	21.54	-0.0548387	1.3023
256.7	19.49	22.49	-0.0818182	1.35973	336.7	18.71	21.71	0.105882	1.31258
260	19.22	22.22	0.0705882	1.34341	333.3	18.35	21.35	-0.0882353	1.29081
263.4	19.46	22.46	0.130303	1.35792	329.9	18.65	21.65	0.0241379	1.30895
266.7	19.89	22.89	-0.0774194	1.38392	327	18.58	21.58	0.0714286	1.30472
269.8	19.65	22.65	0.0366667	1.36941	324.2	18.38	21.38	0.008	1.29262
272.8	19.76	22.76	0.0535714	1.37606	321.7	18.36	21.36	-0.009375	1.29141
275.6	19.91	22.91	-0.15	1.38513	318.5	18.39	21.39	0.139286	1.29323
278.4	19.49	22.49	-0.0178571	1.35973	315.7	18	21	0.0571429	1.26965
281.2	19.44	22.44	0.122581	1.35671	312.9	17.84	20.84	-0.176471	1.25998
284.3	19.82	22.82	0.0566667	1.37969	309.5	18.44	21.44	0.00714286	1.29625
287.3	19.99	22.99	-0.0806452	1.38996	306.7	18.42	21.42	0.135484	1.29504
290.4	19.74	22.74	0.0548387	1.37485	303.6	18	21	0.0714286	1.26965
293.5	19.91	22.91	-0.144118	1.38513	300.8	17.8	20.8	-0.125806	1.25756
296.9	19.42	22.42	0.00666667	1.3555	297.7	18.19	21.19	0.0225806	1.28114
299.9	19.44	22.44	0.145946	1.35671	294.6	18.12	21.12	0.196774	1.2769
303.6	19.98	22.98	-0.0764706	1.38936	291.5	17.51	20.51	-0.203333	1.24002
307	19.72	22.72	-0.126471	1.37364	288.5	18.12	21.12	0.0290323	1.2769
310.4	19.29	22.29	0.169444	1.34764	285.4	18.03	21.03	0.196429	1.27146
314	19.9	22.9	-0.211765	1.38452	282.6	17.48	20.48	-0.15	1.23821
317.4	19.18	22.18	0.0382353	1.34099	279.8	17.9	20.9	-0.0225806	1.2636
320.8	19.31	22.31	0.00294118	1.34885	276.7	17.97	20.97	0.0515152	1.26784
324.2	19.32	22.32	-0.117647	1.34946	273.4	17.8	20.8	-0.00967742	1.25756
327.6	18.92	21.92	0.0294118	1.32527	270.3	17.83	20.83	0.11	1.25937
331	19.02	22.02	0.135484	1.33132	267.3	17.5	20.5	-0.145161	1.23942
334.1	19.44	22.44	-0.0176471	1.35671	264.2	17.95	20.95	0.0129032	1.26663
337.5	19.38	22.38	-0.0771429	1.35308	261.1	17.91	20.91	-0.13	1.26421
341	19.11	22.11	0.0794118	1.33676	258.1	18.3	21.3	0.164286	1.28779
344.4	19.38	22.38	-0.119355	1.35308	255.3	17.84	20.84	0.064	1.25998
347.5	19.01	22.01	-0.0290323	1.33071	252.8	17.68	20.68	-0.0407407	1.2503
350.6	18.92	21.92	0	1.32527	250.1	17.79	20.79	0.16	1.25695
353.8	18.92	21.92	-0.0516129	1.32527	247.6	17.39	20.39	-0.107143	1.23277
356.9	18.76	21.76	0.040625	1.3156	244.8	17.69	20.69	-0.016	1.25091
360.1	18.89	21.89	-0.00344828	1.32346	242.3	17.73	20.73	-0.00740741	1.25333
363	18.88	21.88	0.0225806	1.32285	239.6	17.75	20.75	-0.0392857	1.25453
366.1	18.95	21.95	0.025	1.32709	236.8	17.86	20.86	0.0518519	1.26119
369.3	19.03	22.03	-0.0903226	1.33192	234.1	17.72	20.72	0.075	1.25272
372.4	18.75	21.75	0.00344828	1.31499	231.3	17.51	20.51	-0.05	1.24002
375.3	18.76	21.76	0.071875	1.3156	228.3	17.66	20.66	-0.0407407	1.24909
378.5	18.99	21.99	0.03125	1.3295	225.6	17.77	20.77	0.0821429	1.25574
381.7	19.09	22.09	-0.0617647	1.33555	222.8	17.54	20.54	-0.0814815	1.24184
385.1	18.88	21.88	-0.1	1.32285	220.1	17.76	20.76	0.05	1.25514
388.6	18.53	21.53	0.145714	1.30169	217.1	17.61	20.61	0.00666667	1.24607
392.1	19.04	22.04	-0.0735294	1.33253	214.1	17.59	20.59	0.0321429	1.24486
395.5	18.79	21.79	0.0789474	1.31741	211.3	17.5	20.5	0.0466667	1.23942
399.3	19.09	22.09	-0.151429	1.33555	208.3	17.36	20.36	-0.028125	1.23096
402.8	18.56	21.56	-0.0371429	1.30351	205.1	17.45	20.45	-0.00333333	1.2364
406.3	18.43	21.43	-0.0289474	1.29565	202.1	17.46	20.46	0.00666667	1.237
410.1	18.32	21.32	0.0625	1.289	199.1	17.44	20.44	-0.0636364	1.23579
413.3	18.52	21.52	0.117143	1.30109	195.8	17.65	20.65	-0.143333	1.24849
416.8	18.93	21.93	0.00857143	1.32588	192.8	18.08	21.08	0.00666667	1.27449
420.3	18.96	21.96	0.02	1.32769	189.8	18.06	21.06	0.110345	1.27328
423.8	19.03	22.03	0.0171429	1.33192	186.9	17.74	20.74	0.0407407	1.25393
427.3	19.09	22.09	-0.0142857	1.33555	184.2	17.63	20.63	0	1.24728
430.8	19.04	22.04	-0.0333333	1.33253	181.2	17.63	20.63	0.0592593	1.24728
434.1	18.93	21.93	0.203125	1.32588	178.5	17.47	20.47	0.0925926	1.23761
437.3	19.58	22.58	-0.217143	1.36518	175.8	17.22	20.22	-0.03	1.22249
440.8	18.82	21.82	0.0757576	1.31923	172.8	17.31	20.31	-0.0703704	1.22793
444.1	19.07	22.07	-0.0457143	1.33434	170.1	17.5	20.5	-0.103704	1.23942
447.6	18.91	21.91	0.0212121	1.32467	167.4	17.78	20.78	0.224138	1.25635
450.9	18.98	21.98	-0.0428571	1.3289	164.5	17.13	20.13	-0.062963	1.21705
454.4	18.83	21.83	0.247222	1.31983	161.8	17.3	20.3	0.037037	1.22733
458	19.72	22.72	-0.103125	1.37364	159.1	17.2	20.2	0.0814815	1.22128
461.2	19.39	22.39	-0.186667	1.35369	156.4	16.98	19.98	-0.118519	1.20798
464.2	18.83	21.83	0.2625	1.31983	153.7	17.3	20.3	0.0148148	1.22733
467.4	19.67	22.67	0.0361111	1.37062	151	17.26	20.26	-0.0692308	1.22491
471	19.8	22.8	0.130556	1.37848	148.4	17.44	20.44	-0.06	1.23579
474.6	20.27	23.27	-0.105128	1.40689	145.4	17.62	20.62	-0.175	1.24667
478.5	19.86	22.86	0.0390244	1.3821	143	18.04	21.04	0.193103	1.27207
482.6	20.02	23.02	-0.0538462	1.39178	140.1	17.48	20.48	0.0866667	1.23821
486.5	19.81	22.81	-0.0692308	1.37908	137.1	17.22	20.22	0.0586207	1.22249
490.4	19.54	22.54	0.133333	1.36276	134.2	17.05	20.05	0.00344828	1.21221
493.7	19.98	22.98	0.0848485	1.38936	131.3	17.04	20.04	0.0266667	1.21161
497	20.26	23.26	0.0242424	1.40629	128.3	16.96	19.96	0.1	1.20677
500.3	20.34	23.34	0.0878788	1.41112	125.7	16.7	19.7	0.0296296	1.19105
503.6	20.63	23.63	0.0866667	1.42866	123	16.62	19.62	-0.0576923	1.18622
506.6	20.89	23.89	0.113889	1.44438	120.4	16.77	19.77	-0.12963	1.19528
510.2	21.3	24.3	-0.0521739	1.46917	117.7	17.12	20.12	0.123077	1.21644
514.8	21.06	24.06	-0.0285714	1.45466	115.1	16.8	19.8	-0.0583333	1.1971
519	20.94	23.94	-0.05	1.4474	112.7	16.94	19.94	-0.052381	1.20556
523.2	20.73	23.73	-0.00930233	1.4347	110.6	17.05	20.05	-0.1	1.21221
527.5	20.69	23.69	0.109524	1.43229	108.2	17.29	20.29	0.0111111	1.22672
531.7	21.15	24.15	0.0225	1.4601	105.5	17.26	20.26	0.0521739	1.22491
535.7	21.24	24.24	0.055814	1.46554	103.2	17.14	20.14	0.0666667	1.21765
540	21.48	24.48	0.00769231	1.48005	100.8	16.98	19.98	-0.0047619	1.20798
543.9	21.51	24.51	0.2525	1.48186	98.7	16.99	19.99	0.0541667	1.20859
547.9	22.52	25.52	0.0972973	1.54293	96.3	16.86	19.86	-0.0047619	1.20073
551.6	22.88	25.88	-0.0846154	1.56469	94.2	16.87	19.87	0.0190476	1.20133
555.5	22.55	25.55	0.0162162	1.54474	92.1	16.83	19.83	-0.0285714	1.19891
559.2	22.61	25.61	-0.1	1.54837	90	16.89	19.89	-0.0428571	1.20254
562.6	22.27	25.27	-0.143243	1.52781	87.9	16.98	19.98	0.0380952	1.20798
566.3	21.74	24.74	0.172973	1.49577	85.8	16.9	19.9	0.0444444	1.20314
570	22.38	25.38	0.191176	1.53446	84	16.82	19.82	-0.104762	1.19831
573.4	23.03	26.03	-0.320588	1.57376	81.9	17.04	20.04	0.0842105	1.21161
576.8	21.94	24.94	-1.31892	1.50786	80	16.88	19.88	0.00952381	1.20193
580.5	17.06	20.06	-2.325	1.21282	77.9	16.86	19.86	-0.138889	1.20073
584.5	7.76	10.76	-1.62432	0.650544	76.1	17.11	20.11	0.133333	1.21584
588.2	1.75	4.75	-0.585294	0.287183	74	16.83	19.83	-0.0222222	1.19891
591.6	-0.24	2.76	-0.279412	0.166868	72.2	16.87	19.87	0.0578947	1.20133
595	-1.19	1.81	-0.00571429	0.109432	70.3	16.76	19.76	-0.127778	1.19468
598.5	-1.21	1.79	-0.148387	0.108222	68.5	16.99	19.99	0.15	1.20859
601.6	-1.67	1.33	0.174194	0.0804111	66.9	16.75	19.75	-0.0166667	1.19407
604.7	-1.13	1.87	-0.326316	0.113059	65.1	16.78	19.78	-0.1375	1.19589
606.6	-1.75	1.25	0.366667	0.0755744	63.5	17	20	0.0833333	1.20919
607.5	-1.42	1.58	0.666667	0.095526	61.7	16.85	19.85	-0.113333	1.20012
607.8	-1.22	1.78	-0.00200724	0.107618	60.2	17.02	20.02	0.125	1.2104
					58.6	16.82	19.82	0.0555556	1.19831
					56.8	16.72	19.72	0.0952381	1.19226
					54.7	16.52	19.52	-0.0304348	1.18017
					52.4	16.59	19.59	0.0375	1.1844
					50	16.5	19.5	-0.1	1.17896
					47.7	16.73	19.73	-0.0428571	1.19287
					45.6	16.82	19.82	0.0555556	1.19831
					43.8	16.72	19.72	0	1.19226
					42	16.72	19.72	-0.0625	1.19226
					40.4	16.82	19.82	0.0769231	1.19831
					39.1	16.72	19.72	0.427621	1.19226

## Sheet: 995M
				Heating HT					Cooling HT
TEMP	CSUSC		1st deriv	knormed				1st deriv	knormed			Mr	Ms	Hcr	Hc	Mrs/Ms	Bcr/Bc	ΔMr/Ms	ΔBcr/Bc
25.7	22.7	25.7	-0.2	1	609.7	-0.96	2.04	-0.292308	0.0793774		BEFORE	6.869	39.945	379.718	175.006	0.172	2.16974	0.035	-0.170138
26.2	22.6	25.6	0.0388889	0.996109	608.4	-0.58	2.42	0.111111	0.0941634		AFTER	8.62	41.635	435.584	217.835	0.207	1.99961
28	22.67	25.67	-0.0678571	0.998833	606.6	-0.78	2.22	-0.0157895	0.0863813
30.8	22.48	25.48	-0.0351351	0.99144	604.7	-0.75	2.25	0.288	0.0875486
34.5	22.35	25.35	0.0473684	0.986381	602.2	-1.47	1.53	-0.028	0.0595331
38.3	22.53	25.53	-0.0216216	0.993385	599.7	-1.4	1.6	0.0821429	0.0622568
42	22.45	25.45	0.178788	0.990272	596.9	-1.63	1.37	-0.228571	0.0533074
45.3	23.04	26.04	0.0216216	1.01323	594.1	-0.99	2.01	-0.375	0.0782101
49	23.12	26.12	0.125806	1.01634	591.3	0.06	3.06	-0.4	0.119066
52.1	23.51	26.51	-0.0741935	1.03152	588.5	1.18	4.18	-1.85161	0.162646
55.2	23.28	26.28	0.13871	1.02257	585.4	6.92	9.92	-2.8871	0.385992
58.3	23.71	26.71	-0.037931	1.0393	582.3	15.87	18.87	-3.17941	0.734241
61.2	23.6	26.6	-0.0730769	1.03502	578.9	26.68	29.68	-1.22353	1.15486
63.8	23.41	26.41	0.107692	1.02763	575.5	30.84	33.84	-0.845161	1.31673
66.4	23.69	26.69	-0.17619	1.03852	572.4	33.46	36.46	-0.476667	1.41868
68.5	23.32	26.32	-0.0714286	1.02412	569.4	34.89	37.89	0.0967742	1.47432
70.6	23.17	26.17	0.0391304	1.01829	566.3	34.59	37.59	-0.0709677	1.46265
72.9	23.26	26.26	0.171429	1.02179	563.2	34.81	37.81	0.00967742	1.47121
75	23.62	26.62	-0.119048	1.0358	560.1	34.78	37.78	0.0151515	1.47004
77.1	23.37	26.37	-0.05	1.02607	556.8	34.73	37.73	0.267647	1.46809		Tc1	Tc2
79.5	23.25	26.25	0.141667	1.0214	553.4	33.82	36.82	-0.0941176	1.43268		581.1	582.3
81.9	23.59	26.59	0.203846	1.03463	550	34.14	37.14	-0.0727273	1.44514		HPR 1	HPR 2	A40[%]
84.5	24.12	27.12	-0.114286	1.05525	546.7	34.38	37.38	0.216129	1.45447		1.47315	1.3869	7.01136
86.6	23.88	26.88	-0.0576923	1.04591	543.6	33.71	36.71	-0.025	1.4284		Kmax h	Kmax c
89.2	23.73	26.73	0.245833	1.04008	540	33.8	36.8	-0.0911765	1.43191		37.86	37.89
91.6	24.32	27.32	0.05	1.06304	536.6	34.11	37.11	0.0266667	1.44397
94.2	24.45	27.45	-0.120833	1.06809	533.6	34.03	37.03	0.151613	1.44086
96.6	24.16	27.16	0	1.05681	530.5	33.56	36.56	-0.0166667	1.42257
98.9	24.16	27.16	0.2875	1.05681	527.5	33.61	36.61	-0.106061	1.42451
101.3	24.85	27.85	-0.0137931	1.08366	524.2	33.96	36.96	0.217647	1.43813
104.2	24.81	27.81	-0.0666667	1.0821	520.8	33.22	36.22	0.0424242	1.40934
106.9	24.63	27.63	0.206897	1.0751	517.5	33.08	36.08	0.0166667	1.40389
109.8	25.23	28.23	0.180769	1.09844	513.9	33.02	36.02	0.0486486	1.40156
112.4	25.7	28.7	-0.117241	1.11673	510.2	32.84	35.84	-0.338889	1.39455
115.3	25.36	28.36	0.0703704	1.1035	506.6	34.06	37.06	0.315152	1.44202
118	25.55	28.55	0.0192308	1.11089	503.3	33.02	36.02	-0.175758	1.40156
120.6	25.6	28.6	0.0111111	1.11284	500	33.6	36.6	0.139394	1.42412
123.3	25.63	28.63	0.0769231	1.11401	496.7	33.14	36.14	-0.133333	1.40623
125.9	25.83	28.83	0.0962963	1.12179	493.4	33.58	36.58	0.263636	1.42335
128.6	26.09	29.09	-0.037037	1.13191	490.1	32.71	35.71	0.0424242	1.38949
131.3	25.99	28.99	0.0692308	1.12802	486.8	32.57	35.57	-0.0424242	1.38405
133.9	26.17	29.17	0.0888889	1.13502	483.5	32.71	35.71	0.318182	1.38949
136.6	26.41	29.41	0.0375	1.14436	480.2	31.66	34.66	-0.0914286	1.34864
139	26.5	29.5	0.122222	1.14786	476.7	31.98	34.98	0.248485	1.36109
141.7	26.83	29.83	-0.0423077	1.1607	473.4	31.16	34.16	-0.169444	1.32918
144.3	26.72	29.72	0.0296296	1.15642	469.8	31.77	34.77	0.19375	1.35292
147	26.8	29.8	-0.0222222	1.15953	466.6	31.15	34.15	-0.0972222	1.32879
149.7	26.74	29.74	0.172414	1.1572	463	31.5	34.5	0.0333333	1.34241
152.6	27.24	30.24	-0.048	1.17665	459.7	31.39	34.39	0.08	1.33813
155.1	27.12	30.12	0.207692	1.17198	456.2	31.11	34.11	0.125	1.32724
157.7	27.66	30.66	-0.144444	1.193	452.6	30.66	33.66	-0.155263	1.30973
160.4	27.27	30.27	0.0466667	1.17782	448.8	31.25	34.25	0.0805556	1.33268
163.4	27.41	30.41	-0.203704	1.18327	445.2	30.96	33.96	0.0285714	1.3214
166.1	26.86	29.86	0.268966	1.16187	441.7	30.86	33.86	0.231429	1.31751
169	27.64	30.64	-0.13	1.19222	438.2	30.05	33.05	-0.00666667	1.28599
172	27.25	30.25	0.216667	1.17704	435.2	30.07	33.07	-0.0885714	1.28677
175	27.9	30.9	-0.0137931	1.20233	431.7	30.38	33.38	0.084375	1.29883
177.9	27.86	30.86	-0.0166667	1.20078	428.5	30.11	33.11	0.0828571	1.28833
180.9	27.81	30.81	0.159259	1.19883	425	29.82	32.82	0.0771429	1.27704
183.6	28.24	31.24	-0.13	1.21556	421.5	29.55	32.55	-0.0394737	1.26654
186.6	27.85	30.85	0.359259	1.20039	417.7	29.7	32.7	0.0818182	1.27237
189.3	28.82	31.82	-0.113333	1.23813	414.4	29.43	32.43	0.165385	1.26187
192.3	28.48	31.48	-0.0633333	1.2249	411.8	29	32	-0.246154	1.24514
195.3	28.29	31.29	0.188889	1.21751	409.2	29.64	32.64	-0.0137931	1.27004
198	28.8	31.8	0.0266667	1.23735	406.3	29.68	32.68	-0.0793103	1.2716
201	28.88	31.88	-0.116667	1.24047	403.4	29.91	32.91	-0.0103448	1.28054
204	28.53	31.53	0.05	1.22685	400.5	29.94	32.94	0.059375	1.28171
207	28.68	31.68	0.11875	1.23268	397.3	29.75	32.75	0.131034	1.27432
210.2	29.06	32.06	0.119355	1.24747	394.4	29.37	32.37	-0.0586207	1.25953
213.3	29.43	32.43	0.00740741	1.26187	391.5	29.54	32.54	0.265517	1.26615
216	29.45	32.45	-0.06	1.26265	388.6	28.77	31.77	-0.209375	1.23619
219	29.27	32.27	-0.0515152	1.25564	385.4	29.44	32.44	0.121875	1.26226
222.3	29.1	32.1	0.0962963	1.24903	382.2	29.05	32.05	0.13871	1.24708
225	29.36	32.36	-0.0857143	1.25914	379.1	28.62	31.62	-0.2125	1.23035
227.8	29.12	32.12	0.0333333	1.24981	375.9	29.3	32.3	0.0517241	1.25681
230.8	29.22	32.22	0.222222	1.2537	373	29.15	32.15	0.15625	1.25097
233.5	29.82	32.82	-0.2	1.27704	369.8	28.65	31.65	0.2	1.23152
236	29.32	32.32	0.232	1.25759	366.7	28.03	31.03	0.08	1.20739
238.5	29.9	32.9	-0.024	1.28016	363.2	27.75	30.75	-0.0935484	1.1965
241	29.84	32.84	0.159259	1.27782	360.1	28.04	31.04	-0.0676471	1.20778
243.7	30.27	33.27	-0.0677419	1.29455	356.7	28.27	31.27	-0.028125	1.21673
246.8	30.06	33.06	0.266667	1.28638	353.5	28.36	31.36	0.0758621	1.22023
250.1	30.94	33.94	-0.29697	1.32062	350.6	28.14	31.14	0.264516	1.21167
253.4	29.96	32.96	0.221212	1.28249	347.5	27.32	30.32	-0.280645	1.17977
256.7	30.69	33.69	-0.112121	1.31089	344.4	28.19	31.19	0.4	1.21362
260	30.32	33.32	-0.0548387	1.2965	341.2	26.91	29.91	-0.354839	1.16381
263.1	30.15	33.15	0.336667	1.28988	338.1	28.01	31.01	0.102941	1.20661
266.1	31.16	34.16	0.00357143	1.32918	334.7	27.66	30.66	-0.145161	1.193
268.9	31.17	34.17	0.0580645	1.32957	331.6	28.11	31.11	0.294118	1.21051
272	31.35	34.35	-0.176667	1.33658	328.2	27.11	30.11	0.1	1.1716
275	30.82	33.82	0.0321429	1.31595	325.3	26.82	29.82	-0.121429	1.16031
277.8	30.91	33.91	0.0970588	1.31946	322.5	27.16	30.16	0.0258065	1.17354
281.2	31.24	34.24	-0.0464286	1.3323	319.4	27.08	30.08	0.0774194	1.17043
284	31.11	34.11	-0.0363636	1.32724	316.3	26.84	29.84	0.0322581	1.16109
287.3	30.99	33.99	-0.0806452	1.32257	313.2	26.74	29.74	-0.0580645	1.1572
290.4	30.74	33.74	-0.0419355	1.31284	310.1	26.92	29.92	0.0129032	1.1642
293.5	30.61	33.61	0.326471	1.30778	307	26.88	29.88	0.209677	1.16265
296.9	31.72	34.72	-0.193333	1.35097	303.9	26.23	29.23	0.0428571	1.13735
299.9	31.14	34.14	0.0970588	1.3284	301.1	26.11	29.11	-0.148387	1.13268
303.3	31.47	34.47	-0.158824	1.34125	298	26.57	29.57	0.0774194	1.15058
306.7	30.93	33.93	0.135294	1.32023	294.9	26.33	29.33	0.0354839	1.14125
310.1	31.39	34.39	-0.170588	1.33813	291.8	26.22	29.22	-0.0322581	1.13696
313.5	30.81	33.81	0.030303	1.31556	288.7	26.32	29.32	-0.0366667	1.14086
316.8	30.91	33.91	-0.197059	1.31946	285.7	26.43	29.43	0.112903	1.14514
320.2	30.24	33.24	0.2625	1.29339	282.6	26.08	29.08	-0.114286	1.13152
323.4	31.08	34.08	-0.23871	1.32607	279.8	26.4	29.4	0.114286	1.14397
326.5	30.34	33.34	0.108824	1.29728	277	26.08	29.08	-0.103226	1.13152
329.9	30.71	33.71	0.177419	1.31167	273.9	26.4	29.4	0.324242	1.14397
333	31.26	34.26	-0.00645161	1.33307	270.6	25.33	28.33	-0.119355	1.10233
336.1	31.24	34.24	-0.108824	1.3323	267.5	25.7	28.7	-0.0833333	1.11673
339.5	30.87	33.87	0.261765	1.3179	264.5	25.95	28.95	-0.148387	1.12646
342.9	31.76	34.76	-0.242857	1.35253	261.4	26.41	29.41	0.3	1.14436
346.4	30.91	33.91	0.0225806	1.31946	258.7	25.6	28.6	-0.0645161	1.11284
349.5	30.98	33.98	-0.083871	1.32218	255.6	25.8	28.8	-0.02	1.12062
352.6	30.72	33.72	0.3125	1.31206	252.6	25.86	28.86	-0.128571	1.12296
355.8	31.72	34.72	-0.190323	1.35097	249.8	26.22	29.22	0.228571	1.13696
358.9	31.13	34.13	-0.0171429	1.32802	247	25.58	28.58	-0.296296	1.11206
362.4	31.07	34.07	0.0225806	1.32568	244.3	26.38	29.38	0.187097	1.14319
365.5	31.14	34.14	-0.009375	1.3284	241.2	25.8	28.8	-0.0518519	1.12062
368.7	31.11	34.11	0.0411765	1.32724	238.5	25.94	28.94	0.235714	1.12607
372.1	31.25	34.25	0.065625	1.33268	235.7	25.28	28.28	0.00666667	1.10039
375.3	31.46	34.46	-0.146875	1.34086	232.7	25.26	28.26	0.0222222	1.09961
378.5	30.99	33.99	0.03125	1.32257	230	25.2	28.2	-0.0903226	1.09728
381.7	31.09	34.09	-0.0243243	1.32646	226.9	25.48	28.48	0.0222222	1.10817
385.4	31	34	0.0315789	1.32296	224.2	25.42	28.42	0.0466667	1.10584
389.2	31.12	34.12	-0.0470588	1.32763	221.2	25.28	28.28	0.06	1.10039
392.6	30.96	33.96	-0.0742857	1.3214	218.2	25.1	28.1	-0.0214286	1.09339
396.1	30.7	33.7	-0.110526	1.31128	215.4	25.16	28.16	-0.0866667	1.09572
399.9	30.28	33.28	-0.137143	1.29494	212.4	25.42	28.42	0.0407407	1.10584
403.4	29.8	32.8	0.20625	1.27626	209.7	25.31	28.31	0.0366667	1.10156
406.6	30.46	33.46	-0.04375	1.30195	206.7	25.2	28.2	0.0333333	1.09728
409.8	30.32	33.32	0	1.2965	204	25.11	28.11	0.107407	1.09377
413.3	30.32	33.32	-0.0542857	1.2965	201.3	24.82	27.82	-0.41	1.08249
416.8	30.13	33.13	0.00857143	1.28911	198.3	26.05	29.05	0.153571	1.13035
420.3	30.16	33.16	0.0485714	1.29027	195.5	25.62	28.62	0.113793	1.11362
423.8	30.33	33.33	0.015625	1.29689	192.6	25.29	28.29	0.176667	1.10078
427	30.38	33.38	0.131429	1.29883	189.6	24.76	27.76	0.00740741	1.08016
430.5	30.84	33.84	-0.0305556	1.31673	186.9	24.74	27.74	-0.213333	1.07938
434.1	30.73	33.73	-0.015625	1.31245	183.9	25.38	28.38	0.0555556	1.10428
437.3	30.68	33.68	-0.210345	1.31051	181.2	25.23	28.23	0.0222222	1.09844
440.2	30.07	33.07	0.278788	1.28677	178.5	25.17	28.17	-0.0925926	1.09611
443.5	30.99	33.99	-0.278125	1.32257	175.8	25.42	28.42	0.17	1.10584
446.7	30.1	33.1	0.157576	1.28794	172.8	24.91	27.91	0.151852	1.08599
450	30.62	33.62	-0.0586207	1.30817	170.1	24.5	27.5	-0.0666667	1.07004
452.9	30.45	33.45	0.218182	1.30156	167.4	24.68	27.68	0.125926	1.07704
456.2	31.17	34.17	-0.0552632	1.32957	164.7	24.34	27.34	-0.207407	1.06381
460	30.96	33.96	0.102778	1.3214	162	24.9	27.9	0.0875	1.0856
463.6	31.33	34.33	0.145714	1.3358	159.6	24.69	27.69	0.0444444	1.07743
467.1	31.84	34.84	-0.0454545	1.35564	156.9	24.57	27.57	-0.0916667	1.07276
470.4	31.69	34.69	0.0121212	1.34981	154.5	24.79	27.79	0.0222222	1.08132
473.7	31.73	34.73	-0.169444	1.35136	151.8	24.73	27.73	-0.257692	1.07899
477.3	31.12	34.12	0.0206897	1.32763	149.2	25.4	28.4	0.274074	1.10506
480.2	31.18	34.18	0.172727	1.32996	146.5	24.66	27.66	-0.2	1.07626
483.5	31.75	34.75	-0.0166667	1.35214	143.8	25.2	28.2	0.188889	1.09728
487.1	31.69	34.69	-0.0166667	1.34981	141.1	24.69	27.69	-0.0153846	1.07743
490.7	31.63	34.63	0.0333333	1.34747	138.5	24.73	27.73	-0.13	1.07899
494.6	31.76	34.76	0.0638889	1.35253	135.5	25.12	28.12	0.230769	1.09416
498.2	31.99	34.99	-0.0102564	1.36148	132.9	24.52	27.52	-0.0733333	1.07082
502.1	31.95	34.95	0.0282051	1.35992	129.9	24.74	27.74	0.155172	1.07938
506	32.06	35.06	0.269697	1.3642	127	24.29	27.29	0.0269231	1.06187
509.3	32.95	35.95	0.0648649	1.39883	124.4	24.22	27.22	0.00740741	1.05914
513	33.19	36.19	-0.0638889	1.40817	121.7	24.2	27.2	-0.2	1.05837
516.6	32.96	35.96	0.0972222	1.39922	119.3	24.68	27.68	0.0307692	1.07704
520.2	33.31	36.31	-0.155	1.41284	116.7	24.6	27.6	-0.00833333	1.07393
524.2	32.69	35.69	-0.0606061	1.38872	114.3	24.62	27.62	-0.0296296	1.07471
527.5	32.49	35.49	0.136364	1.38093	111.6	24.7	27.7	-0.0666667	1.07782
530.8	32.94	35.94	-0.0675676	1.39844	109.2	24.86	27.86	-0.0576923	1.08405
534.5	32.69	35.69	0.0527778	1.38872	106.6	25.01	28.01	0.257692	1.08988
538.1	32.88	35.88	0.158824	1.39611	104	24.34	27.34	0.0708333	1.06381
541.5	33.42	36.42	-0.155556	1.41712	101.6	24.17	27.17	-0.0166667	1.0572
545.1	32.86	35.86	0.280645	1.39533	99.2	24.21	27.21	-0.158333	1.05875
548.2	33.73	36.73	0.132353	1.42918	96.8	24.59	27.59	0.13913	1.07354
551.6	34.18	37.18	0.226667	1.44669	94.5	24.27	27.27	-0.108333	1.06109
554.6	34.86	37.86	-0.0135135	1.47315	92.1	24.53	27.53	0.0125	1.07121
558.3	34.81	37.81	-0.0108108	1.47121	89.7	24.5	27.5	0.104762	1.07004
562	34.77	37.77	-0.0025	1.46965	87.6	24.28	27.28	0.0809524	1.06148
566	34.76	37.76	-0.0783784	1.46926	85.5	24.11	27.11	-0.104762	1.05486
569.7	34.47	37.47	-0.4825	1.45798	83.4	24.33	27.33	0.0142857	1.06342
573.7	32.54	35.54	-0.802703	1.38288	81.3	24.3	27.3	-0.133333	1.06226
577.4	29.57	32.57	-2.40541	1.26732	79.2	24.58	27.58	0.052381	1.07315
581.1	20.67	23.67	-3.3725	0.921012	77.1	24.47	27.47	0.0166667	1.06887
585.1	7.18	10.18	-1.68	0.396109	75.3	24.44	27.44	0.155556	1.0677
589.1	0.46	3.46	-0.247368	0.13463	73.5	24.16	27.16	-0.221053	1.05681
592.9	-0.48	2.52	-0.0027027	0.0980545	71.6	24.58	27.58	0.0666667	1.07315
596.6	-0.49	2.51	-0.191892	0.0976654	69.8	24.46	27.46	-0.133333	1.06848
600.3	-1.2	1.8	0.132258	0.0700389	68	24.7	27.7	0.3	1.07782
603.4	-0.79	2.21	-0.08125	0.0859922	66.4	24.22	27.22	0.133333	1.05914
606.6	-1.05	1.95	0.181818	0.0758755	64.6	23.98	26.98	-0.127778	1.04981
608.8	-0.65	2.35	-0.441667	0.0914397	62.8	24.21	27.21	-0.0842105	1.05875
610	-1.18	1.82	0.966667	0.0708171	60.9	24.37	27.37	0.24	1.06498
610.3	-0.89	2.11	-0.0014583	0.0821012	59.4	24.01	27.01	-0.172222	1.05097
					57.6	24.32	27.32	-0.047619	1.06304
					55.5	24.42	27.42	0.05	1.06693
					52.9	24.29	27.29	-0.00384615	1.06187
					50.3	24.3	27.3	-0.05	1.06226
					47.7	24.43	27.43	0.00384615	1.06732
					45.1	24.42	27.42	0.0952381	1.06693
					43	24.22	27.22	0	1.05914
					40.9	24.22	27.22	-0.0555556	1.05914
					39.1	24.32	27.32	0.621995	1.06304

## Sheet: 999C
				Heating HT					Cooling HT
TEMP	CSUSC		1st deriv	knormed				1st deriv	knormed			Mr	Ms	Hcr	Hc	Mrs/Ms	Bcr/Bc	ΔMr/Ms	ΔBcr/Bc
24.4	2.9	5.9	-1.33333	1	611.6	-0.75	2.25	0.85	0.381356		BEFORE	1.289	5.564	465.836	220.637	0.232	2.11132	0.026	-0.0975543
24.7	2.5	5.5	0.166667	0.932203	610.6	-1.6	1.4	0	0.237288		AFTER	0.763339	2.963	532.08	264.221	0.258	2.01377
25.9	2.7	5.7	-0.1	0.966102	609.1	-1.6	1.4	-0.04375	0.237288
28.3	2.46	5.46	0.00322581	0.925424	607.5	-1.53	1.47	0	0.249153
31.4	2.47	5.47	-0.00606061	0.927119	605.6	-1.53	1.47	0.177273	0.249153
34.7	2.45	5.45	0.0777778	0.923729	603.4	-1.92	1.08	-0.0666667	0.183051
38.3	2.73	5.73	-0.0205882	0.971186	601	-1.76	1.24	-0.132	0.210169
41.7	2.66	5.66	0.083871	0.959322	598.5	-1.43	1.57	0.136	0.266102
44.8	2.92	5.92	0.016129	1.00339	596	-1.77	1.23	-0.0727273	0.208475
47.9	2.97	5.97	-0.109375	1.01186	593.8	-1.61	1.39	-0.0964286	0.235593
51.1	2.62	5.62	0.0857143	0.952542	591	-1.34	1.66	-0.392857	0.281356
53.9	2.86	5.86	0.037931	0.99322	588.2	-0.24	2.76	-0.122581	0.467797
56.8	2.97	5.97	-0.00357143	1.01186	585.1	0.14	3.14	-0.153571	0.532203
59.6	2.96	5.96	-0.158333	1.01017	582.3	0.57	3.57	-0.185714	0.605085
62	2.58	5.58	0.147826	0.945763	579.5	1.09	4.09	-0.0166667	0.69322
64.3	2.92	5.92	-0.0166667	1.00339	577.1	1.13	4.13	-0.192857	0.7
66.7	2.88	5.88	0.0173913	0.99661	574.3	1.67	4.67	-0.179412	0.791525
69	2.92	5.92	-0.025	1.00339	570.9	2.28	5.28	0.0823529	0.894915
71.4	2.86	5.86	-0.0423077	0.99322	567.5	2	5	-0.2	0.847458		Tc1	Tc2
74	2.75	5.75	0.0833333	0.974576	563.5	2.8	5.8	0.169767	0.983051		586	591
76.4	2.95	5.95	-0.0769231	1.00847	559.2	2.07	5.07	-0.119565	0.859322		HPR 1	HPR 2	A40[%]
79	2.75	5.75	-0.104348	0.974576	554.6	2.62	5.62	0.0627907	0.952542		-	-	-17.6265
81.3	2.51	5.51	0.0380952	0.933898	550.3	2.35	5.35	-0.175	0.90678		Kmax h	Kmax c
83.4	2.59	5.59	0.220833	0.947458	546.7	2.98	5.98	0.0162162	1.01356
85.8	3.12	6.12	-0.229167	1.03729	543	2.92	5.92	-0.0545455	1.00339
88.2	2.57	5.57	0.261538	0.944068	539.7	3.1	6.1	0.0290323	1.0339
90.8	3.25	6.25	0.0307692	1.05932	536.6	3.01	6.01	-0.00606061	1.01864
93.4	3.33	6.33	-0.108333	1.07288	533.3	3.03	6.03	0.122581	1.02203
95.8	3.07	6.07	-0.0307692	1.02881	530.2	2.65	5.65	-0.141667	0.957627
98.4	2.99	5.99	0.0166667	1.01525	526.6	3.16	6.16	-0.0027027	1.04407
100.8	3.03	6.03	0.0346154	1.02203	522.9	3.17	6.17	0.163889	1.04576
103.4	3.12	6.12	0.0703704	1.03729	519.3	2.58	5.58	-0.119444	0.945763
106.1	3.31	6.31	0.0192308	1.06949	515.7	3.01	6.01	0.0848485	1.01864
108.7	3.36	6.36	0.0551724	1.07797	512.4	2.73	5.73	-0.0324324	0.971186
111.6	3.52	6.52	-0.0888889	1.10508	508.7	2.85	5.85	-0.155556	0.991525
114.3	3.28	6.28	0.0344828	1.06441	505.1	3.41	6.41	0.0333333	1.08644
117.2	3.38	6.38	0.00769231	1.08136	501.8	3.3	6.3	-0.0666667	1.0678
119.8	3.4	6.4	-0.0833333	1.08475	498.2	3.54	6.54	0.160606	1.10847
122.8	3.15	6.15	0.0346154	1.04237	494.9	3.01	6.01	-0.0484848	1.01864
125.4	3.24	6.24	-0.0583333	1.05763	491.6	3.17	6.17	0.0787879	1.04576
127.8	3.1	6.1	0.0666667	1.0339	488.3	2.91	5.91	-0.0242424	1.00169
130.5	3.28	6.28	0.025	1.06441	485	2.99	5.99	0.0363636	1.01525
132.9	3.34	6.34	0.0769231	1.07458	481.7	2.87	5.87	-0.03125	0.994915
135.5	3.54	6.54	-0.0185185	1.10847	478.5	2.97	5.97	-0.0272727	1.01186
138.2	3.49	6.49	0.0413793	1.1	475.2	3.06	6.06	0.00909091	1.02712
141.1	3.61	6.61	-0.140741	1.12034	471.9	3.03	6.03	0.0916667	1.02203
143.8	3.23	6.23	0.0148148	1.05593	468.3	2.7	5.7	-0.075	0.966102
146.5	3.27	6.27	0.188889	1.06271	465.1	2.94	5.94	-0.0638889	1.00678
149.2	3.78	6.78	-0.05	1.14915	461.5	3.17	6.17	-0.0828571	1.04576
151.8	3.65	6.65	-0.0366667	1.12712	458	3.46	6.46	0.125	1.09492
154.8	3.54	6.54	0.0758621	1.10847	454.4	3.01	6.01	-0.00285714	1.01864
157.7	3.76	6.76	0	1.14576	450.9	3.02	6.02	-0.0916667	1.02034
160.7	3.76	6.76	-0.0206897	1.14576	447.3	3.35	6.35	0.106897	1.07627
163.6	3.7	6.7	-0.0433333	1.13559	444.4	3.04	6.04	-0.106667	1.02373
166.6	3.57	6.57	-0.0733333	1.11356	441.4	3.36	6.36	0.12	1.07797
169.6	3.35	6.35	-0.00689655	1.07627	437.9	2.94	5.94	0.0878788	1.00678
172.5	3.33	6.33	0.156667	1.07288	434.6	2.65	5.65	-0.0342857	0.957627
175.5	3.8	6.8	-0.0766667	1.15254	431.1	2.77	5.77	-0.009375	0.977966
178.5	3.57	6.57	-0.0551724	1.11356	427.9	2.8	5.8	0.062069	0.983051
181.4	3.41	6.41	0	1.08644	425	2.62	5.62	0.01875	0.952542
184.7	3.41	6.41	0.206667	1.08644	421.8	2.56	5.56	-0.14	0.942373
187.7	4.03	7.03	-0.0633333	1.19153	418.8	2.98	5.98	0.0448276	1.01356
190.7	3.84	6.84	-0.0137931	1.15932	415.9	2.85	5.85	0.065625	0.991525
193.6	3.8	6.8	0.1	1.15254	412.7	2.64	5.64	0.0689655	0.955932
196.6	4.1	7.1	-0.037037	1.20339	409.8	2.44	5.44	-0.040625	0.922034
199.3	4	7	-0.0892857	1.18644	406.6	2.57	5.57	-0.148276	0.944068
202.1	3.75	6.75	-0.0966667	1.14407	403.7	3	6	-0.04375	1.01695
205.1	3.46	6.46	0.0566667	1.09492	400.5	3.14	6.14	-0.0657143	1.04068
208.1	3.63	6.63	-0.0166667	1.12373	397	3.37	6.37	-0.0657143	1.07966
211.1	3.58	6.58	0.0133333	1.11525	393.5	3.6	6.6	0.14375	1.11864
214.1	3.62	6.62	0.0606061	1.12203	390.3	3.14	6.14	0.162069	1.04068
217.4	3.82	6.82	-0.01	1.15593	387.4	2.67	5.67	-0.190323	0.961017
220.4	3.79	6.79	-0.1	1.15085	384.3	3.26	6.26	-0.028125	1.06102
223.4	3.49	6.49	0.133333	1.1	381.1	3.35	6.35	0.154286	1.07627
226.1	3.85	6.85	-0.08	1.16102	377.6	2.81	5.81	0.0724138	0.984746
228.6	3.65	6.65	0.00740741	1.12712	374.7	2.6	5.6	-0.0774194	0.949153
231.3	3.67	6.67	-0.016	1.13051	371.6	2.84	5.84	0.040625	0.989831
233.8	3.63	6.63	0.110714	1.12373	368.4	2.71	5.71	0.00967742	0.967797
236.6	3.94	6.94	0.0291667	1.17627	365.3	2.68	5.68	-0.003125	0.962712
239	4.01	7.01	0.00645161	1.18814	362.1	2.69	5.69	0.046875	0.964407
242.1	4.03	7.03	0.0966667	1.19153	358.9	2.54	5.54	0.125806	0.938983
245.1	4.32	7.32	-0.0214286	1.24068	355.8	2.15	5.15	-0.09375	0.872881
247.9	4.26	7.26	-0.00909091	1.23051	352.6	2.45	5.45	-0.0529412	0.923729
251.2	4.23	7.23	-0.00277778	1.22542	349.2	2.63	5.63	0.0258065	0.954237
254.8	4.22	7.22	-0.136364	1.22373	346.1	2.55	5.55	0.065625	0.940678
258.1	3.77	6.77	0.23	1.14746	342.9	2.34	5.34	-0.0645161	0.905085
261.1	4.46	7.46	-0.173529	1.26441	339.8	2.54	5.54	0.0464286	0.938983
264.5	3.87	6.87	0.20303	1.16441	337	2.41	5.41	-0.040625	0.916949
267.8	4.54	7.54	-0.13871	1.27797	333.8	2.54	5.54	-0.0645161	0.938983
270.9	4.11	7.11	0.12	1.20508	330.7	2.74	5.74	0.0774194	0.972881
273.9	4.47	7.47	-0.119355	1.2661	327.6	2.5	5.5	0	0.932203
277	4.1	7.1	0.0857143	1.20339	324.8	2.5	5.5	0.129412	0.932203
279.8	4.34	7.34	-0.125806	1.24407	321.4	2.06	5.06	-0.0676471	0.857627
282.9	3.95	6.95	0.14	1.17797	318	2.29	5.29	0.0451613	0.89661
285.9	4.37	7.37	0.105882	1.24915	314.9	2.15	5.15	0.0352941	0.872881
289.3	4.73	7.73	-0.105882	1.31017	311.5	2.03	5.03	-0.345161	0.852542
292.7	4.37	7.37	0.0515152	1.24915	308.4	3.1	6.1	0.235484	1.0339
296	4.54	7.54	-0.0588235	1.27797	305.3	2.37	5.37	0.075	0.910169
299.4	4.34	7.34	0.0647059	1.24407	302.5	2.16	5.16	-0.0451613	0.874576
302.8	4.56	7.56	-0.0322581	1.28136	299.4	2.3	5.3	-0.05	0.898305
305.9	4.46	7.46	-0.069697	1.26441	296.6	2.44	5.44	0.0612903	0.922034
309.2	4.23	7.23	0.0264706	1.22542	293.5	2.25	5.25	0.0214286	0.889831
312.6	4.32	7.32	-0.0756757	1.24068	290.7	2.19	5.19	-0.0774194	0.879661
316.3	4.04	7.04	-0.0243243	1.19322	287.6	2.43	5.43	0.129032	0.920339
320	3.95	6.95	0.00882353	1.17797	284.5	2.03	5.03	0.0933333	0.852542
323.4	3.98	6.98	0.0516129	1.18305	281.5	1.75	4.75	-0.203571	0.805085
326.5	4.14	7.14	-0.00882353	1.21017	278.7	2.32	5.32	-0.016	0.901695
329.9	4.11	7.11	-0.0970588	1.20508	276.2	2.36	5.36	0.128571	0.908475
333.3	3.78	6.78	0.111765	1.14915	273.4	2	5	-0.117857	0.847458
336.7	4.16	7.16	-0.120588	1.21356	270.6	2.33	5.33	0.0741935	0.90339
340.1	3.75	6.75	0.161765	1.14407	267.5	2.1	5.1	-0.125926	0.864407
343.5	4.3	7.3	-0.156757	1.23729	264.8	2.44	5.44	0.232143	0.922034
347.2	3.72	6.72	0.075	1.13898	262	1.79	4.79	-0.119355	0.811864
350.4	3.96	6.96	-0.0705882	1.17966	258.9	2.16	5.16	-0.0518519	0.874576
353.8	3.72	6.72	0.174194	1.13898	256.2	2.3	5.3	0	0.898305
356.9	4.26	7.26	-0.108571	1.23051	253.4	2.3	5.3	0	0.898305
360.4	3.88	6.88	0.00322581	1.1661	250.6	2.3	5.3	0.114815	0.898305
363.5	3.89	6.89	0.08	1.1678	247.9	1.99	4.99	-0.0714286	0.845763
367	4.17	7.17	-0.0387097	1.21525	245.1	2.19	5.19	0.0214286	0.879661
370.1	4.05	7.05	-0.0628571	1.19492	242.3	2.13	5.13	-0.00740741	0.869492
373.6	3.83	6.83	0.0793103	1.15763	239.6	2.15	5.15	-0.00357143	0.872881
376.5	4.06	7.06	0.0870968	1.19661	236.8	2.16	5.16	0.0166667	0.874576
379.6	4.33	7.33	0.0142857	1.24237	233.8	2.11	5.11	0.0777778	0.866102
383.1	4.38	7.38	-0.0625	1.25085	231.1	1.9	4.9	0.0142857	0.830508
386.3	4.18	7.18	0.04375	1.21695	228.3	1.86	4.86	-0.0366667	0.823729
389.5	4.32	7.32	-0.180645	1.24068	225.3	1.97	4.97	-0.174074	0.842373
392.6	3.76	6.76	0.196875	1.14576	222.6	2.44	5.44	0.122581	0.922034
395.8	4.39	7.39	-0.0815789	1.25254	219.5	2.06	5.06	0.0185185	0.857627
399.6	4.08	7.08	-0.0473684	1.2	216.8	2.01	5.01	-0.03	0.849153
403.4	3.9	6.9	-0.0926829	1.16949	213.8	2.1	5.1	-0.03	0.864407
407.5	3.52	6.52	0.028125	1.10508	210.8	2.19	5.19	-0.0222222	0.879661
410.7	3.61	6.61	0.106897	1.12034	208.1	2.25	5.25	0.139286	0.889831
413.6	3.92	6.92	-0.0724138	1.17288	205.3	1.86	4.86	-0.0296296	0.823729
416.5	3.71	6.71	0.04375	1.13729	202.6	1.94	4.94	0.00333333	0.837288
419.7	3.85	6.85	-0.0742857	1.16102	199.6	1.93	4.93	-0.1	0.835593
423.2	3.59	6.59	0.108571	1.11695	196.9	2.2	5.2	0.0433333	0.881356
426.7	3.97	6.97	-0.0657143	1.18136	193.9	2.07	5.07	-0.136667	0.859322
430.2	3.74	6.74	0	1.14237	190.9	2.48	5.48	0.0481481	0.928814
433.8	3.74	6.74	0.0394737	1.14237	188.2	2.35	5.35	0.062963	0.90678
437.6	3.89	6.89	-0.215789	1.1678	185.5	2.18	5.18	-0.0666667	0.877966
441.4	3.07	6.07	0.0777778	1.02881	182.8	2.36	5.36	0.0962963	0.908475
445	3.35	6.35	-0.040625	1.07627	180.1	2.1	5.1	0.0266667	0.864407
448.2	3.22	6.22	-0.115625	1.05424	177.1	2.02	5.02	-0.0851852	0.850847
451.4	2.85	5.85	-0.0333333	0.991525	174.4	2.25	5.25	0.0259259	0.889831
455.3	2.72	5.72	0.160526	0.969492	171.7	2.18	5.18	0	0.877966
459.1	3.33	6.33	0.0538462	1.07288	169	2.18	5.18	0.127586	0.877966
463	3.54	6.54	-0.119444	1.10847	166.1	1.81	4.81	-0.0518519	0.815254
466.6	3.11	6.11	0.053125	1.03559	163.4	1.95	4.95	-0.0740741	0.838983
469.8	3.28	6.28	0.205556	1.06441	160.7	2.15	5.15	-0.04	0.872881
473.4	4.02	7.02	-0.133333	1.18983	157.7	2.27	5.27	0.0791667	0.89322
477	3.54	6.54	0.12	1.10847	155.3	2.08	5.08	0.0241379	0.861017
480.5	3.96	6.96	0	1.17966	152.4	2.01	5.01	-0.183333	0.849153
483.8	3.96	6.96	-0.233333	1.17966	150	2.45	5.45	0.0966667	0.923729
487.1	3.19	6.19	0.0111111	1.04915	147	2.16	5.16	-0.0814815	0.874576
490.7	3.23	6.23	-0.075	1.05593	144.3	2.38	5.38	0.0586207	0.911864
494.3	2.96	5.96	0.0611111	1.01017	141.4	2.21	5.21	0.062069	0.883051
497.9	3.18	6.18	0.112121	1.04746	138.5	2.03	5.03	0.103333	0.852542
501.2	3.55	6.55	0.069697	1.11017	135.5	1.72	4.72	-0.153846	0.8
504.5	3.78	6.78	-0.0277778	1.14915	132.9	2.12	5.12	0.244444	0.867797
508.1	3.68	6.68	0.0264706	1.1322	130.2	1.46	4.46	-0.182759	0.755932
511.5	3.77	6.77	-0.124242	1.14746	127.3	1.99	4.99	0.0241379	0.845763
514.8	3.36	6.36	0.184848	1.07797	124.4	1.92	4.92	0.118519	0.833898
518.1	3.97	6.97	-0.260606	1.18136	121.7	1.6	4.6	-0.148148	0.779661
521.4	3.11	6.11	0.0441176	1.03559	119	2	5	0	0.847458
524.8	3.26	6.26	-0.0878788	1.06102	116.7	2	5	0.0296296	0.847458
528.1	2.97	5.97	0.0242424	1.01186	114	1.92	4.92	-0.0333333	0.833898
531.4	3.05	6.05	-0.0108108	1.02542	111.6	2	5	0.0115385	0.847458
535.1	3.01	6.01	0.0472222	1.01864	109	1.97	4.97	-0.0166667	0.842373
538.7	3.18	6.18	-0.0117647	1.04746	106.6	2.01	5.01	0.0291667	0.849153
542.1	3.14	6.14	0.173333	1.04068	104.2	1.94	4.94	0.0291667	0.837288
545.1	3.66	6.66	-0.203226	1.12881	101.8	1.87	4.87	0.0666667	0.825424
548.2	3.03	6.03	0.0735294	1.02203	99.7	1.73	4.73	-0.0391304	0.801695
551.6	3.28	6.28	0.175758	1.06441	97.4	1.82	4.82	0.0666667	0.816949
554.9	3.86	6.86	-0.212903	1.16271	95	1.66	4.66	-0.0333333	0.789831
558	3.2	6.2	-0.0351351	1.05085	92.6	1.74	4.74	-0.0238095	0.80339
561.7	3.07	6.07	-0.167647	1.02881	90.5	1.79	4.79	-0.126087	0.811864
565.1	2.5	5.5	-0.0757576	0.932203	88.2	2.08	5.08	-0.104762	0.861017
568.4	2.25	5.25	-0.0117647	0.889831	86.1	2.3	5.3	0.180952	0.898305
571.8	2.21	5.21	-0.137838	0.883051	84	1.92	4.92	-0.00952381	0.833898
575.5	1.7	4.7	0.0459459	0.79661	81.9	1.94	4.94	0.0666667	0.837288
579.2	1.87	4.87	-0.347059	0.825424	79.5	1.78	4.78	0.0571429	0.810169
582.6	0.69	3.69	-0.0852941	0.625424	77.4	1.66	4.66	0.00952381	0.789831
586	0.4	3.4	-0.367742	0.576271	75.3	1.64	4.64	-0.00952381	0.786441
589.1	-0.74	2.26	-0.148571	0.383051	73.2	1.66	4.66	-0.142857	0.789831
592.6	-1.26	1.74	0.102703	0.294915	71.1	1.96	4.96	0.0333333	0.840678
596.3	-0.88	2.12	-0.137838	0.359322	69	1.89	4.89	0.0722222	0.828814
600	-1.39	1.61	-0.0473684	0.272881	67.2	1.76	4.76	-0.0666667	0.80678
603.8	-1.57	1.43	0.0470588	0.242373	65.4	1.88	4.88	-0.0631579	0.827119
607.2	-1.41	1.59	-0.0727273	0.269492	63.5	2	5	0.0277778	0.847458
609.4	-1.57	1.43	-0.0666667	0.242373	61.7	1.95	4.95	-0.0888889	0.838983
610.9	-1.67	1.33	0.6	0.225424	59.9	2.11	5.11	0.138095	0.866102
611.6	-1.25	1.75	-0.00204382	0.29661	57.8	1.82	4.82	0.047619	0.816949
					55.7	1.72	4.72	0.0115385	0.8
					53.1	1.69	4.69	-0.00357143	0.794915
					50.3	1.7	4.7	-0.0448276	0.79661
					47.4	1.83	4.83	0.0423077	0.818644
					44.8	1.72	4.72	0	0.8
					42.5	1.72	4.72	-0.0434783	0.8
					40.2	1.82	4.82	0.0526316	0.816949
					38.3	1.72	4.72	0.0449086	0.8

[truncated: 12 more sheets: 999M1, 999M2, 1100, 1194, 1224C, 1224DG, 810, 999G1, 999G2, 1097, 1149, 1150]
